# Supplementary material for: Esterase mediated insecticide resistance in the German cockroach, {\it Blattella germanica/} (L.) (Dictyoptera: Blattellidae)
Source: PLOS journal article supplement (doi:10.1371/journal.pone.0223146), 1995-01-01
Supplement: S6 (10.1371/journal.pone.0223146.s006) [file journal.pone.0223146.s006]

## CIR2-Female-Questionnaire-v6-jkp.xlsx

|                                                                                                                                                                                                                                                                                                                                                                                             |                                                                                                                                                                          |         |
|---------------------------------------------------------------------------------------------------------------------------------------------------------------------------------------------------------------------------------------------------------------------------------------------------------------------------------------------------------------------------------------------|--------------------------------------------------------------------------------------------------------------------------------------------------------------------------|---------|
| 001a. Are you in the correct household? EA: [EA entered in the Household Questionnaire] Structure #: [Structure entered in the Household Questionnaire] Household #: [Household entered in the Household Questionnaire]                                                                                                                                                                     | <input type="radio"/> Yes<br><input type="radio"/> No                                                                                                                    | Always  |
| 002. Enter your ID below.<br><i>Please record your ID</i>                                                                                                                                                                                                                                                                                                                                   |                                                                                                                                                                          | 002 = 0 |
| 003b. Record the correct date and time.                                                                                                                                                                                                                                                                                                                                                     | Day: _____<br>Month: _____<br>Year: _____                                                                                                                                | 003 = 0 |
| The following information is from the Household Questionnaire. Please review to make sure you are interviewing the correct respondent. [ODK will display the LIST OF GEOGRAPHIES ENTERED, Enumeration Area, Structure Number, and Household Number entered into the Household Questionnaire linked to this Female Questionnaire.] Is the above information correct?                         |                                                                                                                                                                          | Always  |
| Region: \${level1_unlinked}                                                                                                                                                                                                                                                                                                                                                                 | _____                                                                                                                                                                    |         |
| Department: \${level2_unlinked}                                                                                                                                                                                                                                                                                                                                                             | _____                                                                                                                                                                    |         |
| Sub-prefecture: \${level3_unlinked}                                                                                                                                                                                                                                                                                                                                                         | _____                                                                                                                                                                    |         |
| Enumeration Area: [EA]                                                                                                                                                                                                                                                                                                                                                                      | _____                                                                                                                                                                    |         |
| Structure number: [#]                                                                                                                                                                                                                                                                                                                                                                       | _____                                                                                                                                                                    |         |
| Household number: [#]                                                                                                                                                                                                                                                                                                                                                                       | _____                                                                                                                                                                    |         |
| 004b. Is the above information correct?                                                                                                                                                                                                                                                                                                                                                     | <input type="radio"/> Yes<br><input type="radio"/> No                                                                                                                    | 004 = 0 |
| 005. CHECK: You should be attempting to interview [Name of the interviewee]. Is that correct?<br><i>If misspelled, select "yes" and update the name in question "011." If this is the wrong person, you have two options: (1) exit and ignore changes to this form. Open the correct form.<br/>Or (2) find and interview the person whose name appears above.</i>                           | <input type="radio"/> Yes<br><input type="radio"/> No                                                                                                                    | Always  |
| 006. Is the respondent present and available to be interviewed today?                                                                                                                                                                                                                                                                                                                       | <input type="radio"/> Yes<br><input type="radio"/> No                                                                                                                    | Always  |
| 007. How well acquainted are you with the respondent?                                                                                                                                                                                                                                                                                                                                       | <input type="radio"/> Very well acquainted<br><input type="radio"/> Well acquainted<br><input type="radio"/> Not well acquainted<br><input type="radio"/> Not acquainted | 006 = 1 |
| 008. Has the respondent previously participated in PMA 2020 surveys?                                                                                                                                                                                                                                                                                                                        | <input type="radio"/> Yes<br><input type="radio"/> No<br><input type="radio"/> Do not know<br><input type="radio"/> No response                                          | 006 = 1 |
| INFORMED CONSENT<br><i>Find the woman between the age of 15-49 associated with this Female Respondent Questionnaire. The interview must have auditory privacy. Read the following greeting</i>                                                                                                                                                                                              | \${available} = 'yes' and (not(\${unlinked})) or<br>\${proceed_with_unlinked}                                                                                            |         |
| Bonjour. Je m'appelle _____ et je travaille pour l'Institut National de la Statistique de Côte d'Ivoire (INS-Côte d'Ivoire). Nous menons une enquête locale auprès des femmes sur plusieurs questions de santé reproductive, dont les connaissances, les attitudes et l'utilisation de la contraception et de l'avortement. Certaines de ces questions, particulièrement celles portant sur | \${available} = 'yes' and (not(\${unlinked})) or<br>\${proceed_with_unlinked}                                                                                            |         |

|                                                                                                                                                                                                                                                                                                                                                                                                                                                                                                                                                                                                                                                                                                                                                                                                                                                                                                                                                                                                                                                                                                                                                                                                                                                                                                                                             |                                                                     |
|---------------------------------------------------------------------------------------------------------------------------------------------------------------------------------------------------------------------------------------------------------------------------------------------------------------------------------------------------------------------------------------------------------------------------------------------------------------------------------------------------------------------------------------------------------------------------------------------------------------------------------------------------------------------------------------------------------------------------------------------------------------------------------------------------------------------------------------------------------------------------------------------------------------------------------------------------------------------------------------------------------------------------------------------------------------------------------------------------------------------------------------------------------------------------------------------------------------------------------------------------------------------------------------------------------------------------------------------|---------------------------------------------------------------------|
| <p>l'avortement, ont été ajoutées expressément à des fins de recherche. Nous apprécierons grandement votre participation à cette étude. Ces informations nous aideront à informer le gouvernement afin d'offrir de meilleurs services de santé. L'enquête dure généralement entre 30 et 40 minutes. Toute information que vous voudrez bien nous communiquer sera strictement confidentielle, et seules les données rendues complètement anonymes seront utilisées pour mener des analyses, en présenter les résultats et partager les données.</p> <p>La participation à cette enquête, à la fois l'enquête standard et les questions de recherche, est entièrement volontaire. Si nous rencontrons une question à laquelle vous ne souhaitez pas répondre, faites-le moi savoir et je passerai à la suivante. Vous êtes libre de ne pas participer à cette enquête du tout, ou de l'interrompre à tout moment. Cependant, nous espérons que vous voudrez bien y participer car votre opinion est très importante.</p> <p>Si vous avez des questions sur cette étude et sur vos droits en tant que participant à une recherche, vous pouvez me les poser ou contacter M. Aka Doré à l'Institut National de la Statistique de Côte d'Ivoire (INS-Côte d'Ivoire) au +225 09 34 14 94. Jusqu'ici, avez-vous des questions sur l'enquête ?</p> |                                                                     |
| 009a. Provide a paper copy of the Consent Form to the respondent and explain it. Then, ask: May I begin the interview now?                                                                                                                                                                                                                                                                                                                                                                                                                                                                                                                                                                                                                                                                                                                                                                                                                                                                                                                                                                                                                                                                                                                                                                                                                  | 006 = 1<br><input type="radio"/> Yes<br><input type="radio"/> No    |
| 009b. Respondent's signature<br><i>Please ask the respondent to sign or check the box in agreement of their participation.</i>                                                                                                                                                                                                                                                                                                                                                                                                                                                                                                                                                                                                                                                                                                                                                                                                                                                                                                                                                                                                                                                                                                                                                                                                              | (\$ {begin_interview} = 'yes')<br>009a = 1<br>-----                 |
| 010. Interviewer's ID Please record your ID as a witness to the consent process. You previously entered "[Interviewer's ID]."                                                                                                                                                                                                                                                                                                                                                                                                                                                                                                                                                                                                                                                                                                                                                                                                                                                                                                                                                                                                                                                                                                                                                                                                               | \$ {consent_obtained} and<br>(\$ {your_name_check} = 'no')<br>----- |

## Section 1 – Respondent's Background, Marital Status, Household characteristics

*Now I would like to ask about your background and socioeconomic conditions.*

|                                                                                                                                                        |                                                                                                                                                                                                                                                                                                                                                                                                                                     |
|--------------------------------------------------------------------------------------------------------------------------------------------------------|-------------------------------------------------------------------------------------------------------------------------------------------------------------------------------------------------------------------------------------------------------------------------------------------------------------------------------------------------------------------------------------------------------------------------------------|
|                                                                                                                                                        | \$ {consent_obtained}                                                                                                                                                                                                                                                                                                                                                                                                               |
| 101. In what month and year were you born? The age in the household roster is [AGE]                                                                    | 009a = 1                                                                                                                                                                                                                                                                                                                                                                                                                            |
| 101. In what month and year were you born?                                                                                                             | 009a = 1                                                                                                                                                                                                                                                                                                                                                                                                                            |
| Month:                                                                                                                                                 | <input type="radio"/> January<br><input type="radio"/> February<br><input type="radio"/> March<br><input type="radio"/> April<br><input type="radio"/> May<br><input type="radio"/> June<br><input type="radio"/> July<br><input type="radio"/> August<br><input type="radio"/> September<br><input type="radio"/> October<br><input type="radio"/> November<br><input type="radio"/> December<br><input type="radio"/> Do not know |
| Year:                                                                                                                                                  | Year: -----                                                                                                                                                                                                                                                                                                                                                                                                                         |
| 102. How old were you at your last birthday?                                                                                                           | 009a = 1<br>-----                                                                                                                                                                                                                                                                                                                                                                                                                   |
| 103. What is the highest level of school you attended?<br><i>Only record formal schooling. Do not record bible or koranic school or short courses.</i> | 009a = 1<br><input type="radio"/> Never attended<br><input type="radio"/> Primary<br><input type="radio"/> Secondary<br><input type="radio"/> Tertiary                                                                                                                                                                                                                                                                              |

|                                                                                                                                                                                 |                                                                                                                                                                                                                                                                                                                                                                                                                                     |
|---------------------------------------------------------------------------------------------------------------------------------------------------------------------------------|-------------------------------------------------------------------------------------------------------------------------------------------------------------------------------------------------------------------------------------------------------------------------------------------------------------------------------------------------------------------------------------------------------------------------------------|
|                                                                                                                                                                                 | <input type="radio"/> No response<br><div style="text-align: right;">\${consent_obtained}</div>                                                                                                                                                                                                                                                                                                                                     |
| PNSME_101. What is your religion?<br>Select your currently practiced religion                                                                                                   | <input type="radio"/> Muslim<br><input type="radio"/> Catholic<br><input type="radio"/> Methodist<br><input type="radio"/> Evangelica<br><input type="radio"/> Other Christian Religion<br><input type="radio"/> Animast<br><input type="radio"/> Other religion<br><input type="radio"/> No religion<br><input type="radio"/> No response                                                                                          |
| PNSME_102. What ethnic group do you belong to?                                                                                                                                  | <div style="text-align: right;">\${consent_obtained}</div> <input type="radio"/> Akan<br><input type="radio"/> Mandé du sud<br><input type="radio"/> Mandé du nord<br><input type="radio"/> Gur<br><input type="radio"/> Krou<br><input type="radio"/> Other Ivorian<br><input type="radio"/> Other non-Ivorian<br><input type="radio"/> No response                                                                                |
| 104. Are you currently married or living together with a man as if married?<br>Probe: If no, ask whether the respondent is divorced, separated, or widowed.                     | <div style="text-align: right;">009a = 1</div> <input type="radio"/> Yes, currently married<br><input type="radio"/> Yes, living with a man<br><input type="radio"/> Not currently in union: Divorced / separated<br><input type="radio"/> Not currently in union: Widow<br><input type="radio"/> No, never in union<br><input type="radio"/> No response                                                                           |
| 105. Have you been married or lived with a man only once or more than once?                                                                                                     | <div style="text-align: right;">104 ≠ 5</div> <input type="radio"/> Only once<br><input type="radio"/> More than once<br><input type="radio"/> No response                                                                                                                                                                                                                                                                          |
| 106a. In what month and year did you start living with your FIRST husband / partner?<br>Select 'Do not know' for month and '2020' for year to indicate 'No Response'.           | <div style="text-align: right;"> \${marriage_history} = 'more_than_once'<br/> 105=2 </div>                                                                                                                                                                                                                                                                                                                                          |
| Month:                                                                                                                                                                          | <input type="radio"/> January<br><input type="radio"/> February<br><input type="radio"/> March<br><input type="radio"/> April<br><input type="radio"/> May<br><input type="radio"/> June<br><input type="radio"/> July<br><input type="radio"/> August<br><input type="radio"/> September<br><input type="radio"/> October<br><input type="radio"/> November<br><input type="radio"/> December<br><input type="radio"/> Do not know |
| Year:                                                                                                                                                                           | Year: _____                                                                                                                                                                                                                                                                                                                                                                                                                         |
| 106b. CHECK: Based on the response you entered in 106a, the respondent was possibly 15 years old or younger at the time of her first marriage.<br>Did you enter 106a correctly? | <div style="text-align: right;">106a age at marriage ≤15</div> <input type="radio"/> Yes<br><input type="radio"/> No                                                                                                                                                                                                                                                                                                                |
| 107a. Now I would like to ask about when you started living with your CURRENT or MOST RECENT husband / partner. In what month and year was that?                                | <div style="text-align: right;"> \${marriage_history} = 'once' or<br/> \${marriage_history} = 'more_than_once'<br/> 105 = 1 or 2 </div>                                                                                                                                                                                                                                                                                             |

|                                                                                                    |                                                                                                                                                                                                                                                                                                                                                                                                                                                                              |
|----------------------------------------------------------------------------------------------------|------------------------------------------------------------------------------------------------------------------------------------------------------------------------------------------------------------------------------------------------------------------------------------------------------------------------------------------------------------------------------------------------------------------------------------------------------------------------------|
| <p>Select 'Do not know' for month and '2020' for year to indicate 'No Response'.</p> <p>Month:</p> | <p> <input type="radio"/> January<br/> <input type="radio"/> February<br/> <input type="radio"/> March<br/> <input type="radio"/> April<br/> <input type="radio"/> May<br/> <input type="radio"/> June<br/> <input type="radio"/> July<br/> <input type="radio"/> August<br/> <input type="radio"/> September<br/> <input type="radio"/> October<br/> <input type="radio"/> November<br/> <input type="radio"/> December<br/> <input type="radio"/> Do not know         </p> |
| <p>Year:</p>                                                                                       | <p>Year: .....</p>                                                                                                                                                                                                                                                                                                                                                                                                                                                           |

|                                                                                                                                                                                                             |                                                                                                                                                                                                                                                                                                                                 |
|-------------------------------------------------------------------------------------------------------------------------------------------------------------------------------------------------------------|---------------------------------------------------------------------------------------------------------------------------------------------------------------------------------------------------------------------------------------------------------------------------------------------------------------------------------|
| <p>107b. CHECK: Based on the response you entered in 107a, the respondent was possibly 15 years old or younger at the time of her current or most recent marriage.</p> <p>Did you enter 107a correctly?</p> | <p>107a age at marriage ≤15</p> <p> <input type="radio"/> Yes<br/> <input type="radio"/> No         </p>                                                                                                                                                                                                                        |
| <p>108. Does your husband / partner have other wives or does he live with other women as if married?</p>                                                                                                    | <p>104 = 1 or 2</p> <p> <input type="radio"/> Yes<br/> <input type="radio"/> No<br/> <input type="radio"/> Do not know<br/> <input type="radio"/> No response         </p>                                                                                                                                                      |
| <p>PNSME_103. What is the age of your husband / partner?</p> <p>Enter -88 for Do not know and -99 for No response.</p>                                                                                      | <p>(({\$marital_status} = 'currently_married') or<br/>         ({\$marital_status} = 'currently_living_with_man'))</p> <p>.....</p>                                                                                                                                                                                             |
| <p>PNSME_104. What is the highest level of education achieved by your husband / spouse?</p>                                                                                                                 | <p>(({\$marital_status} = 'currently_married') or<br/>         ({\$marital_status} = 'currently_living_with_man'))</p> <p> <input type="radio"/> Never attended<br/> <input type="radio"/> Primary<br/> <input type="radio"/> Secondary<br/> <input type="radio"/> Tertiary<br/> <input type="radio"/> No response         </p> |

## Section 2 – Reproduction, Pregnancy & Fertility Preferences

Now I would like to ask about all the births you have had during your life.

|                                                                                    |                                                                                                                                 |
|------------------------------------------------------------------------------------|---------------------------------------------------------------------------------------------------------------------------------|
| <p>200. Have you ever given birth?</p>                                             | <p>009a = 1</p> <p> <input type="radio"/> Yes<br/> <input type="radio"/> No<br/> <input type="radio"/> No response         </p> |
| <p>201. How many times have you given birth?</p> <p>Enter -99 for no response.</p> | <p>200 = 1</p> <p>.....</p>                                                                                                     |

|                                                                                                                                                                                                                                                                                |                                                                                                                                                                                                                                                     |
|--------------------------------------------------------------------------------------------------------------------------------------------------------------------------------------------------------------------------------------------------------------------------------|-----------------------------------------------------------------------------------------------------------------------------------------------------------------------------------------------------------------------------------------------------|
|                                                                                                                                                                                                                                                                                | <p>({\$birth_events} &gt; 1)</p> <p>201 &gt; 1</p>                                                                                                                                                                                                  |
| <p>205. When was your FIRST birth?</p> <p>Please record the date of the FIRST birth. The date should be found by calculating backwards from memorable events if needed.</p> <p>Select 'Do not know' for month and '2020' for year to indicate 'No Response'.</p> <p>Month:</p> | <p> <input type="radio"/> January<br/> <input type="radio"/> February<br/> <input type="radio"/> March<br/> <input type="radio"/> April<br/> <input type="radio"/> May<br/> <input type="radio"/> June<br/> <input type="radio"/> July         </p> |

|       |                                                                                                                                                                                                           |
|-------|-----------------------------------------------------------------------------------------------------------------------------------------------------------------------------------------------------------|
|       | <input type="radio"/> August<br><input type="radio"/> September<br><input type="radio"/> October<br><input type="radio"/> November<br><input type="radio"/> December<br><input type="radio"/> Do not know |
| Year: | Year: .....                                                                                                                                                                                               |

|                                                                                                                               |                                                                                                                                                                                                                                                                                                                                                                                                                                     |
|-------------------------------------------------------------------------------------------------------------------------------|-------------------------------------------------------------------------------------------------------------------------------------------------------------------------------------------------------------------------------------------------------------------------------------------------------------------------------------------------------------------------------------------------------------------------------------|
|                                                                                                                               | ({birth_events} > 0)<br>201 > 1                                                                                                                                                                                                                                                                                                                                                                                                     |
| 206. When was your MOST RECENT birth?<br><i>Select 'Do not know' for month and '2020' for year to indicate 'No Response'.</i> |                                                                                                                                                                                                                                                                                                                                                                                                                                     |
| Month:                                                                                                                        | <input type="radio"/> January<br><input type="radio"/> February<br><input type="radio"/> March<br><input type="radio"/> April<br><input type="radio"/> May<br><input type="radio"/> June<br><input type="radio"/> July<br><input type="radio"/> August<br><input type="radio"/> September<br><input type="radio"/> October<br><input type="radio"/> November<br><input type="radio"/> December<br><input type="radio"/> Do not know |
| Year:                                                                                                                         | Year: .....                                                                                                                                                                                                                                                                                                                                                                                                                         |

|                             |                                                                                                                                        |
|-----------------------------|----------------------------------------------------------------------------------------------------------------------------------------|
| 210a. Are you pregnant now? | 009a = 1<br><input type="radio"/> Yes<br><input type="radio"/> No<br><input type="radio"/> Unsure<br><input type="radio"/> No response |
|-----------------------------|----------------------------------------------------------------------------------------------------------------------------------------|

|                                                        |                                                                                                                                 |
|--------------------------------------------------------|---------------------------------------------------------------------------------------------------------------------------------|
|                                                        | \${pregnant} = 'yes'<br>210a = 1                                                                                                |
| 210b. How many months pregnant are you?                |                                                                                                                                 |
| The most recent birth was: [Date of most recent birth] | \${recent_birth} != "<br>#####<br>Please record the number of completed months. Enter -88 for do not know, -99 for No response. |

|                                                                                                                                                                                                            |                                                                                                                                                                                                                                                                                                                                            |
|------------------------------------------------------------------------------------------------------------------------------------------------------------------------------------------------------------|--------------------------------------------------------------------------------------------------------------------------------------------------------------------------------------------------------------------------------------------------------------------------------------------------------------------------------------------|
| 209. When did your last menstrual period start?<br><i>If you select days, weeks, months, or years, you will enter a number for X on the next screen. Enter 0 days for today, not 0 weeks/months/years.</i> | 009a = 1<br><input type="radio"/> X days ago<br><input type="radio"/> X weeks ago<br><input type="radio"/> X months ago<br><input type="radio"/> X years ago<br><input type="radio"/> Menopausal / Hysterectomy<br><input type="radio"/> Before last birth<br><input type="radio"/> Never menstruated<br><input type="radio"/> No response |
|------------------------------------------------------------------------------------------------------------------------------------------------------------------------------------------------------------|--------------------------------------------------------------------------------------------------------------------------------------------------------------------------------------------------------------------------------------------------------------------------------------------------------------------------------------------|

|                                                                                                         |                                                                                                                    |
|---------------------------------------------------------------------------------------------------------|--------------------------------------------------------------------------------------------------------------------|
| 209a. Enter [days / weeks / months / years]<br><i>Enter 0 days for today, not 0 weeks/months/years.</i> | ({menstrual_period} = 'days') or<br>({menstrual_period} = 'weeks') or<br>({menstrual_period} = 'month ...<br>..... |
|---------------------------------------------------------------------------------------------------------|--------------------------------------------------------------------------------------------------------------------|

|                                                                                                                                                                |                                                                                                                     |
|----------------------------------------------------------------------------------------------------------------------------------------------------------------|---------------------------------------------------------------------------------------------------------------------|
|                                                                                                                                                                | \${ever_birth} = 'yes' or \${pregnant} = 'yes'<br>201 > 0 AND 210a ≠ 1 201 > 0 AND 210a ≠ 1<br>201 > 0 AND 210a ≠ 1 |
| 213a. Now I would like to ask a question about your last birth.                                                                                                |                                                                                                                     |
| 213b. Now I would like to ask a question about your current pregnancy.                                                                                         | 210a = 1                                                                                                            |
| At the time you became pregnant, did you want to become pregnant then, did you want to wait until later, or did you not want to have any more children at all? | (201 > 1 AND 210a ≠ 1) OR (200 = 1 AND<br>201a = 1)                                                                 |
| At the time you became pregnant, did you want to become pregnant then, did you want to wait until later, or did you not want to have any children at all?      | (201 = 1 AND 210a ≠ 1) OR (200 = 2 AND<br>201a = 1)                                                                 |

|                                                                                                                                                                                                                                                                                                                                                        |                                                                                                                                                                                                                                                                             |
|--------------------------------------------------------------------------------------------------------------------------------------------------------------------------------------------------------------------------------------------------------------------------------------------------------------------------------------------------------|-----------------------------------------------------------------------------------------------------------------------------------------------------------------------------------------------------------------------------------------------------------------------------|
| #####                                                                                                                                                                                                                                                                                                                                                  | <input type="radio"/> Then<br><input type="radio"/> Later<br><input type="radio"/> Not at all<br><input type="radio"/> No response                                                                                                                                          |
| Now I have some questions about the future.                                                                                                                                                                                                                                                                                                            | \$(consent_obtained)                                                                                                                                                                                                                                                        |
| 211a. Would you like to have a child or would you prefer not to have any children?                                                                                                                                                                                                                                                                     | 210a ≠ 1<br><input type="radio"/> Have a child<br><input type="radio"/> Prefer no children<br><input type="radio"/> Says she can't get pregnant<br><input type="radio"/> Undecided / Do not know<br><input type="radio"/> No response                                       |
| 211a. Would you like to have another child or would you prefer not to have any more children?                                                                                                                                                                                                                                                          | 210a ≠ 1<br><input type="radio"/> Have another child<br><input type="radio"/> No more<br><input type="radio"/> Says she can't get pregnant<br><input type="radio"/> Undecided / Do not know<br><input type="radio"/> No response                                            |
| 211b. After the child you are expecting now, would you like to have another child or would you prefer not to have any more children?                                                                                                                                                                                                                   | 210a = 1<br><input type="radio"/> Have another child<br><input type="radio"/> No more<br><input type="radio"/> Says she can't get pregnant<br><input type="radio"/> Undecided / Do not know<br><input type="radio"/> No response                                            |
| 212a. How long would you like to wait from now before the birth of a child?<br><i>If you select months or years, you will enter a number for X on the next screen.</i><br><i>Select "Years" if more than 36 months.</i><br><i>Please check that you correctly entered the value for months/years.</i>                                                  | 211a = 1<br><input type="radio"/> X months<br><input type="radio"/> X years<br><input type="radio"/> Soon/now<br><input type="radio"/> Says she can't get pregnant<br><input type="radio"/> Other<br><input type="radio"/> Do not know<br><input type="radio"/> No response |
| 212b. After the birth of the child you are expecting now, how long would you like to wait before the birth of another child?<br><i>If you select months or years, you will enter a number for X on the next screen.</i><br><i>Select "Years" if more than 36 months.</i><br><i>Please check that you correctly entered the value for months/years.</i> | 211b = 1<br><input type="radio"/> X months<br><input type="radio"/> X years<br><input type="radio"/> Soon/now<br><input type="radio"/> Says she can't get pregnant<br><input type="radio"/> Other<br><input type="radio"/> Do not know<br><input type="radio"/> No response |
| 212c. Enter the number of [Months OR Years] you would like to wait:                                                                                                                                                                                                                                                                                    | 212a OR 212b = 'months' OR 'year'<br>-----                                                                                                                                                                                                                                  |

### Section 3 – Contraception

*Now I would like to talk about family planning - the various ways or methods that a couple can use to delay or avoid a pregnancy.*

*An image will appear on the screen for some methods. If the respondent says that she has not heard of the method or if she hesitates to answer, read the probe aloud and show her the image, if available.*

|                                                                                                                             |                                                                                                        |
|-----------------------------------------------------------------------------------------------------------------------------|--------------------------------------------------------------------------------------------------------|
| 301a. Have you ever heard of female sterilization?<br>PROBE: Women can have an operation to avoid having any more children. | 009a = 1<br><input type="radio"/> Yes<br><input type="radio"/> No<br><input type="radio"/> No response |
| 301b. Have you ever heard of male sterilization?<br>PROBE: Men can have an operation to avoid having any more children.     | 009a = 1<br><input type="radio"/> Yes<br><input type="radio"/> No<br><input type="radio"/> No response |
| 301c. Have you ever heard of the contraceptive implant?                                                                     | 009a = 1                                                                                               |

|                                                                                                                                                                                                                                           |                                                                                                                                                                                                           |
|-------------------------------------------------------------------------------------------------------------------------------------------------------------------------------------------------------------------------------------------|-----------------------------------------------------------------------------------------------------------------------------------------------------------------------------------------------------------|
| <p>PROBE: Women can have one or several small rods placed in her upper arm by a doctor or nurse, which can prevent pregnancy for one or more years.</p> <p>[implant_150x300.png]</p>                                                      | <input type="radio"/> Yes<br><input type="radio"/> No<br><input type="radio"/> No response                                                                                                                |
| <p>301d. Have you ever heard of the IUD?</p> <p>PROBE: Women can have a loop or coil placed inside them by a doctor or a nurse.</p> <p>[IUD_150x300.png]</p>                                                                              | 009a = 1<br><input type="radio"/> Yes<br><input type="radio"/> No<br><input type="radio"/> No response                                                                                                    |
| <p>301e. Have you ever heard of injectables?</p> <p>PROBE: Women can have an injection by a health provider that stops them from becoming pregnant for one or more months.</p> <p>[sayana_depo_150x300.jpg]</p>                           | 009a = 1<br><input type="radio"/> Yes<br><input type="radio"/> No<br><input type="radio"/> No response                                                                                                    |
| <p>301f. Have you ever heard of the (birth control) pill?</p> <p>PROBE: Women can take a pill every day to avoid becoming pregnant.</p> <p>[pill_150x300.png]</p>                                                                         | 009a = 1<br><input type="radio"/> Yes<br><input type="radio"/> No<br><input type="radio"/> No response                                                                                                    |
| <p>301g. Have you ever heard of emergency contraception?</p> <p>PROBE: As an emergency measure after unprotected sexual intercourse women can take special pills at any time within three to five days to prevent pregnancy.</p>          | 009a = 1<br><input type="radio"/> Yes<br><input type="radio"/> No<br><input type="radio"/> No response                                                                                                    |
| <p>301h. Have you ever heard of condoms?</p> <p>PROBE: Men can put a rubber sheath on their penis before sexual intercourse.</p> <p>[male_condom_150x300.png]</p>                                                                         | 009a = 1<br><input type="radio"/> Yes<br><input type="radio"/> No<br><input type="radio"/> No response                                                                                                    |
| <p>301i. Have you ever heard of female condoms?</p> <p>PROBE: Women can put a sheath in their vagina before sexual intercourse.</p> <p>[female_condom_150x300.png]</p>                                                                    | 009a = 1<br><input type="radio"/> Yes<br><input type="radio"/> No<br><input type="radio"/> No response                                                                                                    |
| <p>301j. Have you ever heard of the diaphragm?</p> <p>PROBE: Women can place a thin flexible disk in their vagina before sexual intercourse.</p> <p>[diaphragm_150x300.png]</p>                                                           | 009a = 1<br><input type="radio"/> Yes<br><input type="radio"/> No<br><input type="radio"/> No response                                                                                                    |
| <p>301k. Have you ever heard of foam or jelly as a contraceptive method?</p> <p>PROBE: Women can place a suppository, jelly, or cream in their vagina before sexual intercourse to prevent pregnancy.</p> <p>[spermicide_150x300.png]</p> | 009a = 1<br><input type="radio"/> Yes<br><input type="radio"/> No<br><input type="radio"/> No response                                                                                                    |
| <p>301m. Have you ever heard of the Lactational Amenorrhea Method or LAM?</p>                                                                                                                                                             | 009a = 1<br><input type="radio"/> Yes<br><input type="radio"/> No<br><input type="radio"/> No response                                                                                                    |
| <p>301n. Have you ever heard of the rhythm method?</p> <p>PROBE: Women can avoid pregnancy by not having sexual intercourse on the days of the month they think they can get pregnant.</p>                                                | 009a = 1<br><input type="radio"/> Yes<br><input type="radio"/> No<br><input type="radio"/> No response                                                                                                    |
| <p>301o. Have you ever heard of the withdrawal method?</p> <p>PROBE: Men can be careful and pull out before climax.</p>                                                                                                                   | 009a = 1<br><input type="radio"/> Yes<br><input type="radio"/> No<br><input type="radio"/> No response                                                                                                    |
| <p>301p. Have you ever heard of any other ways or methods that women or men can use to avoid pregnancy?</p>                                                                                                                               | 009a = 1<br><input type="radio"/> Yes<br><input type="radio"/> No<br><input type="radio"/> No response                                                                                                    |
| <p>302a. Are you or your partner currently doing something or using any method to delay or avoid getting pregnant?</p>                                                                                                                    | 210a ≠ 1 AND 009a = 1 210210a ≠ 1 AND 009a = 1 210a ≠ 1 AND 009a = 1 ≠ 1 AND 009a = 1 210a ≠ 1 AND 009a = 1<br><input type="radio"/> Yes<br><input type="radio"/> No<br><input type="radio"/> No response |
| <p>302b. Which method or methods are you using?</p>                                                                                                                                                                                       | <div style="text-align: right;">\${current_user} = 'yes'</div> 009a = 1                                                                                                                                   |

|                                                                                                                                                                                                                                   |                                                                                                                                                                                                                                                                                                                                                                                                                                                                                                                                                                                                                                                                                                                                  |
|-----------------------------------------------------------------------------------------------------------------------------------------------------------------------------------------------------------------------------------|----------------------------------------------------------------------------------------------------------------------------------------------------------------------------------------------------------------------------------------------------------------------------------------------------------------------------------------------------------------------------------------------------------------------------------------------------------------------------------------------------------------------------------------------------------------------------------------------------------------------------------------------------------------------------------------------------------------------------------|
| <p>PROBE: Anything else?</p> <p>Select all methods mentioned. SCROLL TO THE BOTTOM to see all choices.</p>                                                                                                                        | <input type="checkbox"/> Female sterilization<br><input type="checkbox"/> Male sterilization<br><input type="checkbox"/> Implant<br><input type="checkbox"/> IUD<br><input type="checkbox"/> Injectables<br><input type="checkbox"/> Pill<br><input type="checkbox"/> Emergency Contraception<br><input type="checkbox"/> Male condom<br><input type="checkbox"/> Female condom<br><input type="checkbox"/> Diaphragm<br><input type="checkbox"/> Foam/Jelly<br><input type="checkbox"/> Standard Days/Cycle beads<br><input type="checkbox"/> LAM<br><input type="checkbox"/> Rhythm method<br><input type="checkbox"/> Withdrawal<br><input type="checkbox"/> Other traditional method<br><input type="checkbox"/> No response |
| <p>CALC_CM. CALCULATE: CURRENT METHOD</p> <p>THIS WILL NOT APPEAR ON THE SCREEN</p> <p>ODK will identify the most effective method currently being used by the respondent by selecting the highest method in the choice list.</p> | <p>302a=1 AND 302b ≠99</p> <input type="radio"/> Female sterilization<br><input type="radio"/> Male sterilization<br><input type="radio"/> Implant<br><input type="radio"/> IUD<br><input type="radio"/> Injectables<br><input type="radio"/> Pill<br><input type="radio"/> Emergency Contraception<br><input type="radio"/> Male condom<br><input type="radio"/> Female condom<br><input type="radio"/> Diaphragm<br><input type="radio"/> Foam/Jelly<br><input type="radio"/> Standard Days/Cycle beads<br><input type="radio"/> LAM<br><input type="radio"/> Rhythm method<br><input type="radio"/> Withdrawal<br><input type="radio"/> Other traditional method<br><input type="radio"/> No response                         |
| <p>LCL_301. PROBE: Was the injection administered via syringe or small needle?</p> <p>Show the image to the respondent.</p> <p>[sayana_depo_150x300.jpg]</p>                                                                      | <p>CALC CM = 5</p> <input type="radio"/> Syringe<br><input type="radio"/> Small needle (Sayana Press)<br><input type="radio"/> No Response                                                                                                                                                                                                                                                                                                                                                                                                                                                                                                                                                                                       |
| <p>302c. Does your husband/partner know that you are using [CURRENT METHOD]?</p>                                                                                                                                                  | <p>302a = 1</p> <input type="radio"/> Yes<br><input type="radio"/> No<br><input type="radio"/> No response                                                                                                                                                                                                                                                                                                                                                                                                                                                                                                                                                                                                                       |
| <p>302c. Does your husband/partner know that you are using family planning?</p>                                                                                                                                                   | <p>302a = -99</p> <input type="radio"/> Yes<br><input type="radio"/> No<br><input type="radio"/> No response                                                                                                                                                                                                                                                                                                                                                                                                                                                                                                                                                                                                                     |
| <p>305a. You said that you are not currently using a contraceptive method. Do you think you will use a contraceptive method to delay or avoid getting pregnant at any time in the future?</p>                                     | <p>302a ≠1 AND 210a ≠1</p> <input type="radio"/> Yes<br><input type="radio"/> No<br><input type="radio"/> No response                                                                                                                                                                                                                                                                                                                                                                                                                                                                                                                                                                                                            |
| <p>305b. Do you think you will use a contraceptive method to delay or avoid getting pregnant at any time in the future?</p>                                                                                                       | <p>302a ≠1 AND 201a = 1</p> <input type="radio"/> Yes<br><input type="radio"/> No<br><input type="radio"/> No response                                                                                                                                                                                                                                                                                                                                                                                                                                                                                                                                                                                                           |
| <p>306a. In the last 12 months, have you ever done something or used a method to delay or avoid getting pregnant?</p>                                                                                                             | <p>302a ≠1</p> <input type="radio"/> Yes<br><input type="radio"/> No<br><input type="radio"/> No response                                                                                                                                                                                                                                                                                                                                                                                                                                                                                                                                                                                                                        |
|                                                                                                                                                                                                                                   | <p>#{recent_user} = 'yes'</p>                                                                                                                                                                                                                                                                                                                                                                                                                                                                                                                                                                                                                                                                                                    |



|                                                                                                                                                                                                                                                                                                                                         |                                                                                                                                                                                                                                                                                                                                                                                                                                                                                                                                                                                                                                                                                                                                                                                             |
|-----------------------------------------------------------------------------------------------------------------------------------------------------------------------------------------------------------------------------------------------------------------------------------------------------------------------------------------|---------------------------------------------------------------------------------------------------------------------------------------------------------------------------------------------------------------------------------------------------------------------------------------------------------------------------------------------------------------------------------------------------------------------------------------------------------------------------------------------------------------------------------------------------------------------------------------------------------------------------------------------------------------------------------------------------------------------------------------------------------------------------------------------|
| <p>306b. Which method did you use most recently?</p> <p>PROBE: Anything else?</p> <p>Select most effective method (highest method in list). Scroll to bottom to see all choices.</p>                                                                                                                                                    | <p>306a = 1</p> <ul style="list-style-type: none"> <li><input type="radio"/> Male sterilization</li> <li><input type="radio"/> Implant</li> <li><input type="radio"/> IUD</li> <li><input type="radio"/> Injectables</li> <li><input type="radio"/> Pill</li> <li><input type="radio"/> Emergency Contraception</li> <li><input type="radio"/> Male condom</li> <li><input type="radio"/> Female condom</li> <li><input type="radio"/> Diaphragm</li> <li><input type="radio"/> Foam/Jelly</li> <li><input type="radio"/> Standard Days/Cycle beads</li> <li><input type="radio"/> LAM</li> <li><input type="radio"/> Rhythm method</li> <li><input type="radio"/> Withdrawal</li> <li><input type="radio"/> Other traditional method</li> <li><input type="radio"/> No response</li> </ul> |
| <p>LCL_302. PROBE: Was the injection administered via syringe or small needle?</p> <p>Show the image to the respondent.</p> <p>[sayana_depo_150x300.jpg]</p>                                                                                                                                                                            | <p>306b = 5</p> <ul style="list-style-type: none"> <li><input type="radio"/> Syringe</li> <li><input type="radio"/> Small needle (Sayana Press)</li> <li><input type="radio"/> No Response</li> </ul>                                                                                                                                                                                                                                                                                                                                                                                                                                                                                                                                                                                       |
| <p>307. Before you started using [CURRENT METHOD / MOST RECENT METHOD], had you discussed the decision to delay or avoid pregnancy with your husband/partner?</p>                                                                                                                                                                       | <p>302a = 1 OR 306a = 1</p> <ul style="list-style-type: none"> <li><input type="radio"/> Yes</li> <li><input type="radio"/> No</li> <li><input type="radio"/> Do not know</li> <li><input type="radio"/> No response</li> </ul>                                                                                                                                                                                                                                                                                                                                                                                                                                                                                                                                                             |
| <p>308. Would you say that using contraception is mainly your decision, mainly your husband/partner's decision or did you both decide together?</p>                                                                                                                                                                                     | <p>302a = 1</p> <ul style="list-style-type: none"> <li><input type="radio"/> Mainly respondent</li> <li><input type="radio"/> Mainly husband/partner</li> <li><input type="radio"/> Joint decision</li> <li><input type="radio"/> Other</li> <li><input type="radio"/> No response</li> </ul>                                                                                                                                                                                                                                                                                                                                                                                                                                                                                               |
| <p>308a. The last time you received your [CURREN METHOD /MOST RECENT METHOD], how much did you have to pay out of pocket, including any fees paid for the method, supplies or services, and transportation?</p> <p>Enter all prices in FCFA. Zero is a possible answer. Enter -88 if respondent does not know, -99 for no response.</p> | <p>302a = 1 OR 306a = 1</p> <p>-----</p>                                                                                                                                                                                                                                                                                                                                                                                                                                                                                                                                                                                                                                                                                                                                                    |
| <p>309a. Since what month and year have you been using [CURRENT METHOD / MOST RECENT METHOD] without stopping?</p> <p>Calculate backwards from memorable events if needed.</p>                                                                                                                                                          | <p>\$(current_user) = 'yes'</p> <p>302a = 1</p>                                                                                                                                                                                                                                                                                                                                                                                                                                                                                                                                                                                                                                                                                                                                             |
| <p>Most Recent Birth: [mm-yyyy]</p>                                                                                                                                                                                                                                                                                                     | <p>\$(recent_birth) != "</p>                                                                                                                                                                                                                                                                                                                                                                                                                                                                                                                                                                                                                                                                                                                                                                |
| <p>Current Marriage: [mm-yyyy]</p>                                                                                                                                                                                                                                                                                                      | <p>\$(husband_cohabit_start_recent) != "</p>                                                                                                                                                                                                                                                                                                                                                                                                                                                                                                                                                                                                                                                                                                                                                |
| <p>Month:</p>                                                                                                                                                                                                                                                                                                                           | <ul style="list-style-type: none"> <li><input type="radio"/> January</li> <li><input type="radio"/> February</li> <li><input type="radio"/> March</li> <li><input type="radio"/> April</li> <li><input type="radio"/> May</li> <li><input type="radio"/> June</li> <li><input type="radio"/> July</li> <li><input type="radio"/> August</li> <li><input type="radio"/> September</li> <li><input type="radio"/> October</li> <li><input type="radio"/> November</li> <li><input type="radio"/> December</li> <li><input type="radio"/> Do not know</li> </ul>                                                                                                                                                                                                                               |
| <p>Year:</p>                                                                                                                                                                                                                                                                                                                            | <p>Year: -----</p>                                                                                                                                                                                                                                                                                                                                                                                                                                                                                                                                                                                                                                                                                                                                                                          |
|                                                                                                                                                                                                                                                                                                                                         | <p>\$(recent_user) = 'yes'</p>                                                                                                                                                                                                                                                                                                                                                                                                                                                                                                                                                                                                                                                                                                                                                              |

|                                                                                                                                                                                                                                            |                                                                                                                                                                                                                                                                                                                                                                                                                                                                                           |
|--------------------------------------------------------------------------------------------------------------------------------------------------------------------------------------------------------------------------------------------|-------------------------------------------------------------------------------------------------------------------------------------------------------------------------------------------------------------------------------------------------------------------------------------------------------------------------------------------------------------------------------------------------------------------------------------------------------------------------------------------|
| <p>309d. CHECK: Just to make sure I have this correct, you used [CURRENT METHOD / MOST RECENT METHOD] continuously between [START DATE] and [END DATE] without stopping, is that correct?</p>                                              | <p>306a = 1</p> <p><input type="radio"/> Yes</p> <p><input type="radio"/> No</p>                                                                                                                                                                                                                                                                                                                                                                                                          |
| <p>GO BACK TO THE PREVIOUS SCREEN AND PROBE TO DETERMINE THE PERIOD OF MOST RECENT CONTINUOUS USE.</p> <p><i>Suggested probes: - When was the last time you used [METHOD]? - How long had you been using [METHOD] without stopping</i></p> | <p>309d = 0</p>                                                                                                                                                                                                                                                                                                                                                                                                                                                                           |
| <p>310. Why did you stop using [CURRENT METHOD / MOST RECENT METHOD]?</p>                                                                                                                                                                  | <p>306a = 1</p> <p><input type="checkbox"/> Infrequent sex / husband away</p> <p><input type="checkbox"/> Became pregnant while using</p> <p><input type="checkbox"/> Wanted to become pregnant</p> <p><input type="checkbox"/> Husband / partner disapproved</p> <p><input type="checkbox"/> Wanted a more effective method</p> <p><input type="checkbox"/> No method available</p> <p><input type="checkbox"/> Health concerns</p> <p><input type="checkbox"/> Fear of side effects</p> |

- ☐ Lack of access / too far
- ☐ Costs too much
- ☐ Inconvenient to use
- ☐ Fatalistic
- ☐ Difficult to get pregnant / menopausal
- ☐ Interferes with body's processes
- ☐ Other
- ☐ Do not know
- ☐ No response

|                                                                                                                                                                                                     |                                                                                                                                                                                                                                                                                                                                                                                                                                                                                                                                                                                                                                                                                                                                                                                                                                                                                                                                   |
|-----------------------------------------------------------------------------------------------------------------------------------------------------------------------------------------------------|-----------------------------------------------------------------------------------------------------------------------------------------------------------------------------------------------------------------------------------------------------------------------------------------------------------------------------------------------------------------------------------------------------------------------------------------------------------------------------------------------------------------------------------------------------------------------------------------------------------------------------------------------------------------------------------------------------------------------------------------------------------------------------------------------------------------------------------------------------------------------------------------------------------------------------------|
|                                                                                                                                                                                                     | \${current_or_recent_user} and<br>(\${current_recent_method} != 'LAM') and<br>(\${current_recent_method} != ...                                                                                                                                                                                                                                                                                                                                                                                                                                                                                                                                                                                                                                                                                                                                                                                                                   |
| 311a. You first started using [CURRENT METHOD / MOST RECENT METHOD] on [DATE FROM FQ309a OR 309c] Where did you or your partner get it at that time?<br><i>Scroll to bottom to see all choices.</i> | (CALC_CM ≠ 14, 30, 31, 39, -99) OR (306b ≠ 14, 30, 31, 39, -99)<br><input type="radio"/> Government hospital<br><input type="radio"/> Government health center<br><input type="radio"/> Family planning clinic<br><input type="radio"/> Mobile clinic (public)<br><input type="radio"/> Other public<br><input type="radio"/> Private hospital / clinic<br><input type="radio"/> Pharmacy<br><input type="radio"/> Private doctor<br><input type="radio"/> Mobile clinic (private)<br><input type="radio"/> Health agent<br><input type="radio"/> Other private<br><input type="radio"/> Store<br><input type="radio"/> Religious organizations<br><input type="radio"/> Community event<br><input type="radio"/> Friend / parent<br><input type="radio"/> Community health agent<br><input type="radio"/> Street vendor<br><input type="radio"/> Other<br><input type="radio"/> Do not know<br><input type="radio"/> No response |
| 311a. Where did you or your partner get using \${current_recent_label} when you first started using it?<br><i>Scroll to bottom to see all choices.</i>                                              | (CALC_CM ≠ 14, 30, 31, 39, -99) OR (306b ≠ 14, 30, 31, 39, -99)<br><input type="radio"/> Government hospital<br><input type="radio"/> Government health center<br><input type="radio"/> Family planning clinic<br><input type="radio"/> Mobile clinic (public)<br><input type="radio"/> Other public<br><input type="radio"/> Private hospital / clinic<br><input type="radio"/> Pharmacy<br><input type="radio"/> Private doctor<br><input type="radio"/> Mobile clinic (private)<br><input type="radio"/> Health agent<br><input type="radio"/> Other private<br><input type="radio"/> Store<br><input type="radio"/> Religious organizations<br><input type="radio"/> Community event<br><input type="radio"/> Friend / parent<br><input type="radio"/> Community health agent<br><input type="radio"/> Street vendor<br><input type="radio"/> Other<br><input type="radio"/> Do not know<br><input type="radio"/> No response |
| 312a. When you obtained your [CURRENT METHOD / MOST RECENT METHOD], were you told by the provider about side effects or problems you might have with a method to delay or avoid getting pregnant?   | <div style="text-align: right;">311a ≠ .</div> <input type="radio"/> Yes<br><input type="radio"/> No<br><input type="radio"/> No response                                                                                                                                                                                                                                                                                                                                                                                                                                                                                                                                                                                                                                                                                                                                                                                         |
|                                                                                                                                                                                                     | 312a = 1                                                                                                                                                                                                                                                                                                                                                                                                                                                                                                                                                                                                                                                                                                                                                                                                                                                                                                                          |

|                                                                                                                                                                            |                                                                                                                                                                                                                                                                                                                                                                                                                                                                                  |
|----------------------------------------------------------------------------------------------------------------------------------------------------------------------------|----------------------------------------------------------------------------------------------------------------------------------------------------------------------------------------------------------------------------------------------------------------------------------------------------------------------------------------------------------------------------------------------------------------------------------------------------------------------------------|
| 312b. Were you told what to do if you experienced side effects or problems?                                                                                                | <input type="radio"/> Yes<br><input type="radio"/> No<br><input type="radio"/> No response                                                                                                                                                                                                                                                                                                                                                                                       |
| 313. At that time, were you told by the family planning provider about methods of family planning other than the [CURRENT METHOD / MOST RECENT METHOD] that you could use? | <div>311a ≠ . OR 311b ≠ .</div> <input type="radio"/> Yes<br><input type="radio"/> No<br><input type="radio"/> Do not know<br><input type="radio"/> No response                                                                                                                                                                                                                                                                                                                  |
| 314a. During that visit, did you obtain the method you wanted to delay or avoid getting pregnant?                                                                          | <div>311a ≠ .</div> <input type="radio"/> Yes<br><input type="radio"/> No<br><input type="radio"/> No response                                                                                                                                                                                                                                                                                                                                                                   |
| 314c. Why didn't you obtain the method you wanted?                                                                                                                         | <div>314a = 0</div> <input type="radio"/> Method out of stock that day<br><input type="radio"/> Method not available at all<br><input type="radio"/> Provider not trained to provide the method<br><input type="radio"/> Provider recommended a different method<br><input type="radio"/> Not eligible for method<br><input type="radio"/> Decided not to adopt a method<br><input type="radio"/> Too costly<br><input type="radio"/> Other<br><input type="radio"/> No response |
| 315a. During that visit, who made the final decision about what method you got?                                                                                            | <div>311a ≠ .</div> <input type="radio"/> You alone<br><input type="radio"/> Provider<br><input type="radio"/> Partner<br><input type="radio"/> You and provider<br><input type="radio"/> You and partner<br><input type="radio"/> Other<br><input type="radio"/> Do not know<br><input type="radio"/> No response                                                                                                                                                               |
| 315b. Who made the final decision to use rhythm?                                                                                                                           | <div>311b ≠ .</div> <input type="radio"/> You alone<br><input type="radio"/> Provider<br><input type="radio"/> Partner<br><input type="radio"/> You and provider<br><input type="radio"/> You and partner<br><input type="radio"/> Other<br><input type="radio"/> Do not know<br><input type="radio"/> No response                                                                                                                                                               |
| 315b. Who made the final decision to use LAM?                                                                                                                              | <div>311b ≠ .</div> <input type="radio"/> You alone<br><input type="radio"/> Provider<br><input type="radio"/> Partner<br><input type="radio"/> You and provider<br><input type="radio"/> You and partner<br><input type="radio"/> Other<br><input type="radio"/> Do not know<br><input type="radio"/> No response                                                                                                                                                               |
| 316. Would you return to this provider? Provider: [Type of provider selected in 311a or 311b]                                                                              | <div>311a ≠ 35 or 96</div> <input type="radio"/> Yes<br><input type="radio"/> No<br><input type="radio"/> Do not know<br><input type="radio"/> No response                                                                                                                                                                                                                                                                                                                       |
| 317. Would you refer your relative or friend to this provider / facility? Provider: [Type of provider selected in 311a or 311b]                                            | <div>311a ≠ 34 or 96</div> <input type="radio"/> Yes<br><input type="radio"/> No<br><input type="radio"/> Do not know                                                                                                                                                                                                                                                                                                                                                            |

|                                                                                                                                                                                                   |                                                                                                                                                                                                                                                                                                                                                                                                                                                                                                                                                                                                                                                                                           |
|---------------------------------------------------------------------------------------------------------------------------------------------------------------------------------------------------|-------------------------------------------------------------------------------------------------------------------------------------------------------------------------------------------------------------------------------------------------------------------------------------------------------------------------------------------------------------------------------------------------------------------------------------------------------------------------------------------------------------------------------------------------------------------------------------------------------------------------------------------------------------------------------------------|
| SW_1a. Right before you started using [CURRENT METHOD / MOST RECENT METHOD] in [MOIS/ANNEE], were you doing something or using any method to delay or avoid getting pregnant?                     | <input type="radio"/> No response 302a = 1 OR 306a = 1<br><input type="radio"/> Yes<br><input type="radio"/> No<br><input type="radio"/> No response                                                                                                                                                                                                                                                                                                                                                                                                                                                                                                                                      |
| SW_1b. Which method were you using?                                                                                                                                                               | SW_1a = 1<br><input type="radio"/> Male sterilization<br><input type="radio"/> Implant<br><input type="radio"/> IUD<br><input type="radio"/> Injectables<br><input type="radio"/> Pill<br><input type="radio"/> Emergency Contraception<br><input type="radio"/> Male condom<br><input type="radio"/> Female condom<br><input type="radio"/> Diaphragm<br><input type="radio"/> Foam/Jelly<br><input type="radio"/> Standard Days/Cycle beads<br><input type="radio"/> LAM<br><input type="radio"/> Rhythm method<br><input type="radio"/> Withdrawal<br><input type="radio"/> Other traditional method<br><input type="radio"/> No response                                              |
| PP_1. Since the birth of your child in [DATE OF MOST RECENT BIRTH], have you ever done something or used any method to delay or avoid getting pregnant?                                           | child born in last 2 years AND 302a ≠ 1<br><input type="radio"/> Yes<br><input type="radio"/> No<br><input type="radio"/> No response                                                                                                                                                                                                                                                                                                                                                                                                                                                                                                                                                     |
| PP_2. How long after the birth in [DATE OF MOST RECENT BIRTH] did you start doing something or start using a method?<br>Enter 0 days for today. You will enter a number for X on the next screen. | PP_1 = 1 OR (302a = 1 AND child born in the last 2 years)<br><input type="radio"/> X days after<br><input type="radio"/> X weeks after<br><input type="radio"/> X months after<br><input type="radio"/> X years after<br><input type="radio"/> No response                                                                                                                                                                                                                                                                                                                                                                                                                                |
| PP_2. Enter [METHOD].<br>If today, enter zero days only, not zero weeks/months/years.                                                                                                             | \${pp_method_units} = 'days' or<br>\${pp_method_units} = 'weeks' or<br>\${pp_method_units} = 'months' or \${ ...<br>.....                                                                                                                                                                                                                                                                                                                                                                                                                                                                                                                                                                 |
| PP_3. What was the method?                                                                                                                                                                        | PP_2 ≠ .<br><input type="radio"/> Female sterilization<br><input type="radio"/> Male sterilization<br><input type="radio"/> Implant<br><input type="radio"/> IUD<br><input type="radio"/> Injectables<br><input type="radio"/> Pill<br><input type="radio"/> Emergency Contraception<br><input type="radio"/> Male condom<br><input type="radio"/> Female condom<br><input type="radio"/> Diaphragm<br><input type="radio"/> Foam/Jelly<br><input type="radio"/> Standard Days/Cycle beads<br><input type="radio"/> LAM<br><input type="radio"/> Rhythm method<br><input type="radio"/> Withdrawal<br><input type="radio"/> Other traditional method<br><input type="radio"/> No response |
| LCL_PP_302. PROBE: Was the injection administered via syringe or small needle?<br>Show the image to the respondent.<br>[sayana_depo_150x300.jpg]                                                  | PP_3 = 5<br><input type="radio"/> Syringe<br><input type="radio"/> Small needle (Sayana Press)<br><input type="radio"/> No Response                                                                                                                                                                                                                                                                                                                                                                                                                                                                                                                                                       |
| 319. Have you ever done anything or tried in any way to delay or avoid getting pregnant?                                                                                                          | 306a ≠ 1 OR 302a ≠ 1<br><input type="radio"/> Yes                                                                                                                                                                                                                                                                                                                                                                                                                                                                                                                                                                                                                                         |

|                                                                                                                                                                                                                                                                                             |                                                                                                                                                                                                                                                                                                                                                                                                                                                                                                                                                                                                                                                                                                                      |
|---------------------------------------------------------------------------------------------------------------------------------------------------------------------------------------------------------------------------------------------------------------------------------------------|----------------------------------------------------------------------------------------------------------------------------------------------------------------------------------------------------------------------------------------------------------------------------------------------------------------------------------------------------------------------------------------------------------------------------------------------------------------------------------------------------------------------------------------------------------------------------------------------------------------------------------------------------------------------------------------------------------------------|
|                                                                                                                                                                                                                                                                                             | <input type="radio"/> No<br><input type="radio"/> No response                                                                                                                                                                                                                                                                                                                                                                                                                                                                                                                                                                                                                                                        |
| 320. How old were you when you first used a method to delay or avoid getting pregnant? The respondent said she was [AGE] years old at her last birthday.<br>Enter the age in years. Enter -88 if the respondent does not know. Enter -99 if there is no response. Cannot be younger than 9. | 302a = 1 OR 306a = 1 OR 319 = 1<br><br>                                                                                                                                                                                                                                                                                                                                                                                                                                                                                                                                                                                                                                                                              |
| 321. How many living children did you have at that time, if any?<br>Note: the respondent said that she gave birth [NUMBER OF LIFE BIRTHS] times in 201.<br>Enter -99 for no response.                                                                                                       | Age in 320 ≥ 9 AND 200 = 1<br><br>                                                                                                                                                                                                                                                                                                                                                                                                                                                                                                                                                                                                                                                                                   |
| 322. Which method did you first use to delay or avoid getting pregnant?<br>Do not read the method choices. Scroll to bottom to see all choices.                                                                                                                                             | \$(fp_ever_used) = 'yes'<br>319 = 1<br><input type="radio"/> Female sterilization<br><input type="radio"/> Male sterilization<br><input type="radio"/> Implant<br><input type="radio"/> IUD<br><input type="radio"/> Injectables<br><input type="radio"/> Pill<br><input type="radio"/> Emergency Contraception<br><input type="radio"/> Male condom<br><input type="radio"/> Female condom<br><input type="radio"/> Diaphragm<br><input type="radio"/> Foam/Jelly<br><input type="radio"/> Standard Days/Cycle beads<br><input type="radio"/> LAM<br><input type="radio"/> Rhythm method<br><input type="radio"/> Withdrawal<br><input type="radio"/> Other traditional method<br><input type="radio"/> No response |
| LCL_322a. PROBE: Was the injection administered via syringe or small needle?<br>Show the image to the respondent.<br>[sayana_depo_150x300.jpg]                                                                                                                                              | 322 = 5<br><input type="radio"/> Syringe<br><input type="radio"/> Small needle (Sayana Press)<br><input type="radio"/> No Response                                                                                                                                                                                                                                                                                                                                                                                                                                                                                                                                                                                   |
| 322a. Have you used emergency contraception at any time in the last 12 months?<br>PROBE: As an emergency measure after unprotected sexual intercourse women can take special pills at any time within three to five days to prevent pregnancy.                                              | 302b ≠ emergency contraception OR 306b ≠ 8<br><input type="radio"/> Yes<br><input type="radio"/> No<br><input type="radio"/> No response                                                                                                                                                                                                                                                                                                                                                                                                                                                                                                                                                                             |
| 323a. You said that you do not want a child soon and that you are not using a method to avoid pregnancy.                                                                                                                                                                                    | ( (\$current_user = 'no') ) and ( ( (\$more_children_none) = 'no_children') or ...<br>302a = 0 AND ((212a or 212b > 2 years) OR (211a or 211b = 2))                                                                                                                                                                                                                                                                                                                                                                                                                                                                                                                                                                  |
| 323a. You said that you do not want another child soon and that you are not using a method to avoid pregnancy.                                                                                                                                                                              | 302a = 0 AND ((212a or 212b > 2 years) OR (211a or 211b = 2))                                                                                                                                                                                                                                                                                                                                                                                                                                                                                                                                                                                                                                                        |
| 323a. You said that you do not want any children and that you are not using a method to avoid pregnancy.                                                                                                                                                                                    | 302a = 0 AND ((212a or 212b > 2 years) OR (211a or 211b = 2))                                                                                                                                                                                                                                                                                                                                                                                                                                                                                                                                                                                                                                                        |
| 323a. You said that you do not want any more children and that you are not using a method to avoid pregnancy.                                                                                                                                                                               | 302a = 0 AND ((212a or 212b > 2 years) OR (211a or 211b = 2))                                                                                                                                                                                                                                                                                                                                                                                                                                                                                                                                                                                                                                                        |
| Can you tell me why you are not using a method to prevent pregnancy?<br>PROBE: Any other reason?<br>RECORD ALL REASONS MENTIONED Cannot select "Not Married" if 104 is "Yes, currently married".<br>Scroll to bottom to see all choices.                                                    | <input type="checkbox"/> Not married<br><input type="checkbox"/> Infrequent sex / Not having sex<br><input type="checkbox"/> Menopausal / Hysterectomy<br><input type="checkbox"/> Subfecund / Infecund<br><input type="checkbox"/> Not menstruated since last birth<br><input type="checkbox"/> Breastfeeding<br><input type="checkbox"/> Husband away for multiple days<br><input type="checkbox"/> Up to God / fatalistic<br><input type="checkbox"/> Respondent opposed<br><input type="checkbox"/> Husband / partner opposed<br><input type="checkbox"/> Others opposed<br><input type="checkbox"/> Religious prohibition<br><input type="checkbox"/> Knows no method                                           |

|  |                                                                                                                                                                                                                                                                                                                                                                                                                                                                                                                                                                                 |
|--|---------------------------------------------------------------------------------------------------------------------------------------------------------------------------------------------------------------------------------------------------------------------------------------------------------------------------------------------------------------------------------------------------------------------------------------------------------------------------------------------------------------------------------------------------------------------------------|
|  | <input type="checkbox"/> Knows no source<br><input type="checkbox"/> Fear of side effects<br><input type="checkbox"/> Health concerns<br><input type="checkbox"/> Lack of access / too far<br><input type="checkbox"/> Costs too much<br><input type="checkbox"/> Preferred method not available<br><input type="checkbox"/> No method available<br><input type="checkbox"/> Inconvenient to use<br><input type="checkbox"/> Interferes with body's processes<br><input type="checkbox"/> Other<br><input type="checkbox"/> Do not know<br><input type="checkbox"/> No response |
|--|---------------------------------------------------------------------------------------------------------------------------------------------------------------------------------------------------------------------------------------------------------------------------------------------------------------------------------------------------------------------------------------------------------------------------------------------------------------------------------------------------------------------------------------------------------------------------------|

|                                                                                                                                                   |                                                                                                                                                                                                                 |
|---------------------------------------------------------------------------------------------------------------------------------------------------|-----------------------------------------------------------------------------------------------------------------------------------------------------------------------------------------------------------------|
| 323b. Would you say that not using contraception is mainly your decision, mainly your husband/partner's decision or did you both decide together? | 302a = 1<br><input type="radio"/> Mainly respondent<br><input type="radio"/> Mainly husband/partner<br><input type="radio"/> Joint decision<br><input type="radio"/> Other<br><input type="radio"/> No response |
|---------------------------------------------------------------------------------------------------------------------------------------------------|-----------------------------------------------------------------------------------------------------------------------------------------------------------------------------------------------------------------|

|                                                                                                                    |                                                                                                        |
|--------------------------------------------------------------------------------------------------------------------|--------------------------------------------------------------------------------------------------------|
| 324. In the last 12 months, were you visited by a community health worker who talked to you about family planning? | 009a = 1<br><input type="radio"/> Yes<br><input type="radio"/> No<br><input type="radio"/> No response |
|--------------------------------------------------------------------------------------------------------------------|--------------------------------------------------------------------------------------------------------|

|                                                                                                                                   |                                                                                                        |
|-----------------------------------------------------------------------------------------------------------------------------------|--------------------------------------------------------------------------------------------------------|
| 325a. In the last 12 months, have you visited a health facility or camp for care for yourself?<br><i>For any health services.</i> | 009a = 1<br><input type="radio"/> Yes<br><input type="radio"/> No<br><input type="radio"/> No response |
|-----------------------------------------------------------------------------------------------------------------------------------|--------------------------------------------------------------------------------------------------------|

|                                                                                                                                                    |                                                                                                        |
|----------------------------------------------------------------------------------------------------------------------------------------------------|--------------------------------------------------------------------------------------------------------|
| 325a. In the last 12 months, have you visited a health facility or camp for care for yourself or your children?<br><i>For any health services.</i> | 009a = 1<br><input type="radio"/> Yes<br><input type="radio"/> No<br><input type="radio"/> No response |
|----------------------------------------------------------------------------------------------------------------------------------------------------|--------------------------------------------------------------------------------------------------------|

|                                                                                               |                                                                                                        |
|-----------------------------------------------------------------------------------------------|--------------------------------------------------------------------------------------------------------|
| 325b. Did any staff member at the health facility speak to you about family planning methods? | 325a = 1<br><input type="radio"/> Yes<br><input type="radio"/> No<br><input type="radio"/> No response |
|-----------------------------------------------------------------------------------------------|--------------------------------------------------------------------------------------------------------|

|                                                                                 |                       |                       |                       |
|---------------------------------------------------------------------------------|-----------------------|-----------------------|-----------------------|
|                                                                                 |                       | 009a = 1              |                       |
| 326. In the last few months have you:                                           |                       |                       |                       |
|                                                                                 | Yes                   | No                    | No response           |
| 326a. Heard about family planning on the radio?                                 | <input type="radio"/> | <input type="radio"/> | <input type="radio"/> |
| 326b. Seen anything about family planning on the television?                    | <input type="radio"/> | <input type="radio"/> | <input type="radio"/> |
| 326c. Read about family planning in a newspaper or magazine?                    | <input type="radio"/> | <input type="radio"/> | <input type="radio"/> |
| 326d. Received a voice or text message about family planning on a mobile phone? | <input type="radio"/> | <input type="radio"/> | <input type="radio"/> |

|                                                                                                                                                                                 |
|---------------------------------------------------------------------------------------------------------------------------------------------------------------------------------|
| <p align="center"><b>Section 4 – Sexual Activity</b></p> <p align="center"><i>CHECK FOR THE PRESENCE OF OTHERS. BEFORE CONTINUING, MAKE EVERY EFFORT TO ENSURE PRIVACY.</i></p> |
|---------------------------------------------------------------------------------------------------------------------------------------------------------------------------------|

|                                                                                                                                                                                                                                                                                                                                                                  |                      |
|------------------------------------------------------------------------------------------------------------------------------------------------------------------------------------------------------------------------------------------------------------------------------------------------------------------------------------------------------------------|----------------------|
| Now I would like to ask some questions about sexual activity in order to gain a better understanding of some important life issues. Let me assure you again that your answers are completely confidential and will not be told to anyone. If we should come to any question that you don't want to answer, just let me know and we will go to the next question. | \$(consent_obtained) |
|------------------------------------------------------------------------------------------------------------------------------------------------------------------------------------------------------------------------------------------------------------------------------------------------------------------------------------------------------------------|----------------------|

|                                                               |                      |
|---------------------------------------------------------------|----------------------|
|                                                               | \$(consent_obtained) |
| 401a. How old were you when you first had sexual intercourse? | 309a = 1             |
| Current age: [AGE]                                            |                      |
| Number of live births: [NUMBER OF LIFE BIRTHS]                | \$(birth_events) > 0 |
| The respondent is pregnant                                    | \$(pregnant) = 'yes' |

|                                                                                                                                                                                                        |                                                                                                                                                                                                                                                        |
|--------------------------------------------------------------------------------------------------------------------------------------------------------------------------------------------------------|--------------------------------------------------------------------------------------------------------------------------------------------------------------------------------------------------------------------------------------------------------|
| Enter the age in years.<br><i>Enter -77 if she has never had sex. Enter -99 for no response. Enter -88 for do not know.</i>                                                                            | -----                                                                                                                                                                                                                                                  |
|                                                                                                                                                                                                        | (({\$age_at_first_sex} >= 0) or<br>({\$age_at_first_sex} = -88) or<br>({\$age_at_first_sex} = -99))                                                                                                                                                    |
| 402. When was the last time you had sexual intercourse?                                                                                                                                                | 401a ≠ -77                                                                                                                                                                                                                                             |
| 402. Enter [# days / weeks / months / years].<br><i>If today, enter zero days only, not zero weeks/months/years.<br/>Must agree with the age of first sexual intercourse and the pregnancy status.</i> | 401a ≠ 77<br>-----                                                                                                                                                                                                                                     |
| LCL_403. In your opinion, if you have sex only once without using birth control, will you get pregnant?<br><i>Read response options aloud.</i>                                                         | \$(consent_obtained)<br><br><input type="radio"/> Definitely yes<br><input type="radio"/> Maybe yes<br><input type="radio"/> Maybe no<br><input type="radio"/> Definitely no<br><input type="radio"/> Do not know<br><input type="radio"/> No response |
| LCL_404. In your opinion, if you have sex regularly, say twice a week, for a year without using birth control, will you get pregnant?<br><i>Read response options aloud.</i>                           | \$(consent_obtained)<br><br><input type="radio"/> Definitely yes<br><input type="radio"/> Maybe yes<br><input type="radio"/> Maybe no<br><input type="radio"/> Definitely no<br><input type="radio"/> Do not know<br><input type="radio"/> No response |

## Section 6 – Menstrual Hygiene

*Now I'm going to ask you about menstrual hygiene management. This includes the use of absorbent materials; access to a private, clean, safe space; washing as required; and a place to dispose used materials.*

|                                                                                                                                                                                          |                                                                                                                                                                                                                                                                                                                                                                                                                                                                                                                                                                                                                                                                |
|------------------------------------------------------------------------------------------------------------------------------------------------------------------------------------------|----------------------------------------------------------------------------------------------------------------------------------------------------------------------------------------------------------------------------------------------------------------------------------------------------------------------------------------------------------------------------------------------------------------------------------------------------------------------------------------------------------------------------------------------------------------------------------------------------------------------------------------------------------------|
| 602a. Where do you most often change your used pads, cloths, or other sanitary materials?                                                                                                | (209 ≤ 90 days, 13 weeks or ≤ 3 months)<br><input type="radio"/> Flush/pour flush toilet<br><input type="radio"/> Ventilated improved pit latrine<br><input type="radio"/> Pit latrine with slab<br><input type="radio"/> Pit latrine without slab / open pit<br><input type="radio"/> Bucket toilet<br><input type="radio"/> Composting toilet<br><input type="radio"/> Hanging toilet /Hanging latrine<br><input type="radio"/> Shower/washing area<br><input type="radio"/> Sleeping area/bedroom<br><input type="radio"/> Backyard<br><input type="radio"/> No facility / bush / field<br><input type="radio"/> Other<br><input type="radio"/> No response |
| Place: [MAIN PLACE FROM 602a] 602b. While managing your menstrual hygiene, was this place:<br><i>Read each option aloud and select if yes.</i>                                           | 601 ≠ -99 nor null AND 602 ≠ -99 nor null<br><input type="checkbox"/> Clean?<br><input type="checkbox"/> Private?<br><input type="checkbox"/> Safe?<br><input type="checkbox"/> Able to be locked?<br><input type="checkbox"/> Supplied with water?<br><input type="checkbox"/> Supplied with soap?<br><input type="checkbox"/> None of the above<br><input type="checkbox"/> No response                                                                                                                                                                                                                                                                      |
| 603. During your last menstrual period, what did you use to collect or absorb your menstrual blood?<br>PROBE: Anything else?<br><i>Do not read options aloud. Select all that apply.</i> | (209 ≤ 90 days, 13 weeks or ≤ 3 months)<br><input type="checkbox"/> Disposable sanitary pad (commercial)<br><input type="checkbox"/> Reusable sanitary pad<br><input type="checkbox"/> New cloth<br><input type="checkbox"/> Old cloth<br><input type="checkbox"/> Cotton wool                                                                                                                                                                                                                                                                                                                                                                                 |



|                                                                                                                                                                                                                                                     |                                                                                                                                                                                                                                                                                                                                                                                                  |
|-----------------------------------------------------------------------------------------------------------------------------------------------------------------------------------------------------------------------------------------------------|--------------------------------------------------------------------------------------------------------------------------------------------------------------------------------------------------------------------------------------------------------------------------------------------------------------------------------------------------------------------------------------------------|
|                                                                                                                                                                                                                                                     | <input type="checkbox"/> Diaper<br><input type="checkbox"/> Tampons<br><input type="checkbox"/> Toilet paper<br><input type="checkbox"/> Underwear alone<br><input type="checkbox"/> Bucket<br><input type="checkbox"/> Other<br><input type="checkbox"/> No materials used<br><input type="checkbox"/> No response                                                                              |
| 604a. Did you wash and reuse pads, cloths, or other sanitary materials during your last menstrual period?                                                                                                                                           | <p>603 = reusable sanitary pad, old cloth, underwear alone, or bucket</p> <input type="radio"/> Yes<br><input type="radio"/> No<br><input type="radio"/> No response                                                                                                                                                                                                                             |
| 604b. During your last menstrual period, were the sanitary materials that you washed and reused completely dried before each reuse?                                                                                                                 | <p>604a = 1</p> <input type="radio"/> Yes<br><input type="radio"/> No<br><input type="radio"/> No response                                                                                                                                                                                                                                                                                       |
| 605. You mentioned that you used [ODK will display the responses from 603] during your last menstrual period. Where did you dispose of these materials after use? PROBE: Anywhere else?<br><i>Do not read options aloud. Select all that apply.</i> | <p>603 = disposable sanitary pad, new cloth, cotton wool, diaper, tampons, toilet paper, or other OR 604a = 0</p> <input type="checkbox"/> Flush toilet<br><input type="checkbox"/> Latrine<br><input type="checkbox"/> Waste bin/trash bag<br><input type="checkbox"/> Burning<br><input type="checkbox"/> Bush/field<br><input type="checkbox"/> Other<br><input type="checkbox"/> No response |
| 606a. Aside from your own housework, have you done any work in the last month?                                                                                                                                                                      | <p>(209 ≤ 90 days, 13 weeks or ≤ 3 months)</p> <input type="radio"/> Yes<br><input type="radio"/> No<br><input type="radio"/> No response                                                                                                                                                                                                                                                        |
| 606b. Due to your last menstrual period, were there any work days in the last month that you did not attend?                                                                                                                                        | <p>606a = 1</p> <input type="radio"/> Yes<br><input type="radio"/> No<br><input type="radio"/> No response                                                                                                                                                                                                                                                                                       |
| 607a. Did you attend school at any time in the past 12 months?                                                                                                                                                                                      | <p>102 = 15 - 24 AND 103 ≠ never</p> <input type="radio"/> Yes<br><input type="radio"/> No<br><input type="radio"/> No response                                                                                                                                                                                                                                                                  |
| 607b. Due to your menstrual period, were there any school days in the past 12 months that you did not attend?                                                                                                                                       | <p>607a = 1</p> <input type="radio"/> Yes<br><input type="radio"/> No<br><input type="radio"/> No response                                                                                                                                                                                                                                                                                       |

### Section 7.1 – Confidantes

|                                                                                                                                                                                                                                                                                                                                                    |                                                                                                      |
|----------------------------------------------------------------------------------------------------------------------------------------------------------------------------------------------------------------------------------------------------------------------------------------------------------------------------------------------------|------------------------------------------------------------------------------------------------------|
| 701. Now I want to ask some questions about your closest female friends or relatives. These are women whom you share secrets with and who also share theirs with you. How many female friends or relatives like this do you have in Cote d'Ivoire who are between the ages of 15 and 49?<br><i>Enter -88 for do not know, -99 for no response.</i> | <p>\$(consent_obtained)</p> <p>-----</p>                                                             |
| 702a. Please picture your closest female friend or relative in Cote d'Ivoire. Again, this is a woman between the ages of 15 and 49 with whom you share secrets and who also shares hers with you. For ease of referencing this woman, please provide a fake name.                                                                                  | <p>\$(friend_count) &gt; 0</p> <p>-----</p>                                                          |
| 703a. How old was \$(friend1_name) at her last birthday?<br><i>Enter -88 for do not know, -99 for no response.</i>                                                                                                                                                                                                                                 | <p>\$(friend_count) &gt; 0</p> <p>-----</p>                                                          |
| 704a. What is the highest level of school \$(friend1_name) has ever attended?                                                                                                                                                                                                                                                                      | <p>\$(friend_count) &gt; 0</p> <input type="radio"/> Never attended<br><input type="radio"/> Primary |

|                                                                                                                                                                                                                                                                        |                                                                                                                                                                                                                                               |
|------------------------------------------------------------------------------------------------------------------------------------------------------------------------------------------------------------------------------------------------------------------------|-----------------------------------------------------------------------------------------------------------------------------------------------------------------------------------------------------------------------------------------------|
|                                                                                                                                                                                                                                                                        | <input type="radio"/> Secondary<br><input type="radio"/> Tertiary<br><input type="radio"/> No response                                                                                                                                        |
| 702b. Please picture your next closest female friend or relative in Cote d'Ivoire. Again, this is a woman between the ages of 15 and 49 with whom you share secrets and who also shares hers with you. For ease of referencing this woman, please provide a fake name. | <div style="text-align: right;">\${friend_count} &gt; 1</div> <hr/>                                                                                                                                                                           |
| 703b. How old was \${friend2_name} at her last birthday?<br><i>Enter -88 for do not know, -99 for no response.</i>                                                                                                                                                     | <div style="text-align: right;">\${friend_count} &gt; 1</div> <hr/>                                                                                                                                                                           |
| 704b. What is the highest level of school \${friend2_name} has ever attended?                                                                                                                                                                                          | <div style="text-align: right;">\${friend_count} &gt; 1</div> <input type="radio"/> Never attended<br><input type="radio"/> Primary<br><input type="radio"/> Secondary<br><input type="radio"/> Tertiary<br><input type="radio"/> No response |

## Section 7.2 – Abortion

*CHECK FOR THE PRESENCE OF OTHERS. BEFORE CONTINUING, MAKE EVERY EFFORT TO ENSURE PRIVACY.*

|                                                                                                                                                                                                                                                                                                                                                                                                                                                                                                                                |                                                                                                                                                                                                                                                                                                                                                                                                                                                                                                                                                                                                                                                                                                                                                                                                          |
|--------------------------------------------------------------------------------------------------------------------------------------------------------------------------------------------------------------------------------------------------------------------------------------------------------------------------------------------------------------------------------------------------------------------------------------------------------------------------------------------------------------------------------|----------------------------------------------------------------------------------------------------------------------------------------------------------------------------------------------------------------------------------------------------------------------------------------------------------------------------------------------------------------------------------------------------------------------------------------------------------------------------------------------------------------------------------------------------------------------------------------------------------------------------------------------------------------------------------------------------------------------------------------------------------------------------------------------------------|
| <p>The next series of questions are about things women in your community do to remove a pregnancy. This is a common experience in Cote d'Ivoire and we simply want to better understand what women do to remove a pregnancy. I want to remind you that this survey is completely confidential and anonymous and your responses will not be shared with anyone. If we should come to any question that you don't want to answer, just let me know and I will skip to the next question.</p> <p><i>Press OK to continue.</i></p> | <div> <div> <div></div> <div>OK</div> </div> </div>                                                                                                                                                                                                                                                                                                                                                                                                                                                                                                                                                                                                                                                                                                                                                      |
| <p>705. Sometimes women are worried they are pregnant or get pregnant when they do not want to be and they do something to remove the pregnancy. How common is this in the place where you currently live?</p> <p><i>Read response options aloud.</i></p>                                                                                                                                                                                                                                                                      | <div> <div></div> <div> <div></div> <div>Very common</div> <div></div> <div>Somewhat common</div> <div></div> <div>Not very common</div> <div></div> <div>Not at all</div> <div></div> <div>Do not know</div> <div></div> <div>No response</div> </div> </div>                                                                                                                                                                                                                                                                                                                                                                                                                                                                                                                                           |
| <p>706a. In the place where you currently live, what are the ways a woman who is pregnant or worried that she is pregnant can remove a pregnancy? Anything else?</p> <p><i>Do not read options aloud. Select all that apply.</i></p>                                                                                                                                                                                                                                                                                           | <div> <div> <div></div> <div> <div></div> <div> <div></div> <div>Surgical procedure (curettage, MVA, etc.)</div> <div></div> <div>Pills called mifepristone or misoprostol (Cytotec)</div> <div></div> <div>Medicines you take when you have a fever like antibiotics or anti-malarial medicine (Palujecte, Novaquine, Cyphaquine)</div> <div></div> <div>Other pills</div> <div></div> <div>Traditional methods that are not inserted into the vagina (herbs, potions, concoctions)</div> <div></div> <div>Ingested industrial products (bleach, Coke-Nescafé mix, etc.)</div> <div></div> <div>Insert materials into the vagina (stem, herb ball, kanigban, etc.)</div> <div></div> <div>Other</div> <div></div> <div>Do not know</div> <div></div> <div>No response</div> </div> </div> </div> </div> |
| <p>706b. Nonetheless, in your opinion, what could a woman in the place where you live do to remove a pregnancy when she is pregnant or worried that she is pregnant? Anything else?</p>                                                                                                                                                                                                                                                                                                                                        | <div> <div> <div></div> <div> <div></div> <div> <div></div> <div>Surgical procedure (curettage, MVA, etc.)</div> </div> </div> </div> </div>                                                                                                                                                                                                                                                                                                                                                                                                                                                                                                                                                                                                                                                             |

|                                                                                                                                                   |                                                                                                                                                                                                                                                                                                                                                                                                                                                                                                                                                                                                                                                                                                                                                                                                                                                                                                                                                                 |
|---------------------------------------------------------------------------------------------------------------------------------------------------|-----------------------------------------------------------------------------------------------------------------------------------------------------------------------------------------------------------------------------------------------------------------------------------------------------------------------------------------------------------------------------------------------------------------------------------------------------------------------------------------------------------------------------------------------------------------------------------------------------------------------------------------------------------------------------------------------------------------------------------------------------------------------------------------------------------------------------------------------------------------------------------------------------------------------------------------------------------------|
|                                                                                                                                                   | <input type="checkbox"/> Pills called mifepristone or misoprostol (Cytotec)<br><input type="checkbox"/> Medicines you take when you have a fever like antibiotics or anti-malarial medicine (Palujecte, Novaquine, Cyphaquine)<br><input type="checkbox"/> Other pills<br><input type="checkbox"/> Traditional methods that are not inserted into the vagina (herbs, potions, concoctions)<br><input type="checkbox"/> Ingested industrial products (bleach, Coke-Nescafé mix, etc.)<br><input type="checkbox"/> Insert materials into the vagina (stem, herb ball, kanigban, etc.)<br><input type="checkbox"/> Other<br><input type="checkbox"/> Do not know<br><input type="checkbox"/> No response                                                                                                                                                                                                                                                           |
| 707. Which of these ways is the most common?<br><i>Select only one response</i>                                                                   | count-selected({abt_ways}) > 1<br><input type="radio"/> Surgical procedure (curettage, MVA, etc.)<br><input type="radio"/> Pills called mifepristone or misoprostol (Cytotec)<br><input type="radio"/> Medicines you take when you have a fever like antibiotics or anti-malarial medicine (Palujecte, Novaquine, Cyphaquine)<br><input type="radio"/> Other pills<br><input type="radio"/> Traditional methods that are not inserted into the vagina (herbs, potions, concoctions)<br><input type="radio"/> Ingested industrial products (bleach, Coke-Nescafé mix, etc.)<br><input type="radio"/> Insert materials into the vagina (stem, herb ball, kanigban, etc.)<br><input type="radio"/> Other<br><input type="radio"/> Do not know<br><input type="radio"/> No response<br>selected({abt_ways}, filter_list) or (filter_list = 'always')                                                                                                                |
| 708. Where do women go for a surgical procedure to remove a pregnancy? Anywhere else?<br><i>Do not read options aloud. Select all that apply.</i> | (selected({abt_ways}, 'surgery'))<br><input type="checkbox"/> Government hospital<br><input type="checkbox"/> Government health center<br><input type="checkbox"/> Family planning clinic<br><input type="checkbox"/> Mobile clinic (public)<br><input type="checkbox"/> Other public<br><input type="checkbox"/> Private hospital / clinic<br><input type="checkbox"/> Pharmacy<br><input type="checkbox"/> Private doctor<br><input type="checkbox"/> Mobile clinic (private)<br><input type="checkbox"/> Health agent<br><input type="checkbox"/> Other private<br><input type="checkbox"/> Store<br><input type="checkbox"/> Religious organizations<br><input type="checkbox"/> Community event<br><input type="checkbox"/> Friend / parent<br><input type="checkbox"/> Community health agent<br><input type="checkbox"/> Street vendor<br><input type="checkbox"/> Other<br><input type="checkbox"/> Do not know<br><input type="checkbox"/> No response |
| 709. Which of these places is the most common?<br><i>Select only one response</i>                                                                 | count-selected({abt_surg_where}) > 1<br><input type="radio"/> Government hospital                                                                                                                                                                                                                                                                                                                                                                                                                                                                                                                                                                                                                                                                                                                                                                                                                                                                               |

|                                                                                                                                     |                                                                                                                                                                                                                                                                                                                                                                                                                                                                                                                                                                                                                                                                                                                                                                                                                                                                                                                                                                                                                                             |
|-------------------------------------------------------------------------------------------------------------------------------------|---------------------------------------------------------------------------------------------------------------------------------------------------------------------------------------------------------------------------------------------------------------------------------------------------------------------------------------------------------------------------------------------------------------------------------------------------------------------------------------------------------------------------------------------------------------------------------------------------------------------------------------------------------------------------------------------------------------------------------------------------------------------------------------------------------------------------------------------------------------------------------------------------------------------------------------------------------------------------------------------------------------------------------------------|
|                                                                                                                                     | <input type="radio"/> Government health center<br><input type="radio"/> Family planning clinic<br><input type="radio"/> Mobile clinic (public)<br><input type="radio"/> Other public<br><input type="radio"/> Private hospital / clinic<br><input type="radio"/> Pharmacy<br><input type="radio"/> Private doctor<br><input type="radio"/> Mobile clinic (private)<br><input type="radio"/> Health agent<br><input type="radio"/> Other private<br><input type="radio"/> Store<br><input type="radio"/> Religious organizations<br><input type="radio"/> Community event<br><input type="radio"/> Friend / parent<br><input type="radio"/> Community health agent<br><input type="radio"/> Street vendor<br><input type="radio"/> Other<br><input type="radio"/> Do not know<br><input type="radio"/> No response<br>selected({ab_t_surg_where}, filter_list) or<br>(filter_list = 'always')                                                                                                                                                |
| 710. Where do women get the medicines to remove a pregnancy?<br>Anywhere else?<br>Do not read options aloud. Select all that apply. | (selected({ab_t_ways}, 'pills_abortion')) or<br>(selected({ab_t_ways}, 'pills_fever')) or<br>(selected(\$ ...<br><input type="checkbox"/> Government hospital<br><input type="checkbox"/> Government health center<br><input type="checkbox"/> Family planning clinic<br><input type="checkbox"/> Mobile clinic (public)<br><input type="checkbox"/> Other public<br><input type="checkbox"/> Private hospital / clinic<br><input type="checkbox"/> Pharmacy<br><input type="checkbox"/> Private doctor<br><input type="checkbox"/> Mobile clinic (private)<br><input type="checkbox"/> Health agent<br><input type="checkbox"/> Other private<br><input type="checkbox"/> Store<br><input type="checkbox"/> Religious organizations<br><input type="checkbox"/> Community event<br><input type="checkbox"/> Friend / parent<br><input type="checkbox"/> Community health agent<br><input type="checkbox"/> Street vendor<br><input type="checkbox"/> Other<br><input type="checkbox"/> Do not know<br><input type="checkbox"/> No response |
| 711. Which of these sources is the most common?<br>Select only one response                                                         | count-selected({ab_t_meds_where}) > 1<br><input type="radio"/> Government hospital<br><input type="radio"/> Government health center<br><input type="radio"/> Family planning clinic<br><input type="radio"/> Mobile clinic (public)<br><input type="radio"/> Other public<br><input type="radio"/> Private hospital / clinic<br><input type="radio"/> Pharmacy<br><input type="radio"/> Private doctor<br><input type="radio"/> Mobile clinic (private)<br><input type="radio"/> Health agent<br><input type="radio"/> Other private<br><input type="radio"/> Store<br><input type="radio"/> Religious organizations<br><input type="radio"/> Community event<br><input type="radio"/> Friend / parent<br><input type="radio"/> Community health agent<br><input type="radio"/> Street vendor                                                                                                                                                                                                                                              |

|                                                                                                                                                                                                                                                                                     |                                                                                                                                                                                                                                                                                                                                                                                                                                                                                                                                                                                                                                                                                                                                                                                                                                                            |
|-------------------------------------------------------------------------------------------------------------------------------------------------------------------------------------------------------------------------------------------------------------------------------------|------------------------------------------------------------------------------------------------------------------------------------------------------------------------------------------------------------------------------------------------------------------------------------------------------------------------------------------------------------------------------------------------------------------------------------------------------------------------------------------------------------------------------------------------------------------------------------------------------------------------------------------------------------------------------------------------------------------------------------------------------------------------------------------------------------------------------------------------------------|
|                                                                                                                                                                                                                                                                                     | <input type="radio"/> Other<br><input type="radio"/> Do not know<br><input type="radio"/> No response<br>selected(\$ {abt_meds_where}, filter_list) or<br>(filter_list = 'always')                                                                                                                                                                                                                                                                                                                                                                                                                                                                                                                                                                                                                                                                         |
| 712a.i. Now I want to ask some more questions about<br>\${friend1_name}. Has she ever done something to remove a<br>pregnancy when she was pregnant or worried she was pregnant?<br><i>Probe to confirm whether the pregnancy removal was successful. If not,<br/> select 'no.'</i> | <input type="radio"/> Yes, I am certain<br><input type="radio"/> Yes, I think so<br><input type="radio"/> No<br><input type="radio"/> Do not know<br><input type="radio"/> No response                                                                                                                                                                                                                                                                                                                                                                                                                                                                                                                                                                                                                                                                     |
| 713a.i. In what year did this last happen?<br><i>If indicates happened more than once, specify most recent time.<br/> Enter 2020 for 'Do not know' or 'No response'.</i>                                                                                                            | (\$ {friend1_abt_yn} = 'yes') or<br>(\$ {friend1_abt_yn} = 'likely')<br>Year: _____                                                                                                                                                                                                                                                                                                                                                                                                                                                                                                                                                                                                                                                                                                                                                                        |
| 714a.i. Women sometimes do many things to stop a pregnancy<br>from continuing. Did \${friend1_name} do more than one thing to try<br>to remove the pregnancy?                                                                                                                       | (\$ {friend1_abt_yn} = 'yes') or<br>(\$ {friend1_abt_yn} = 'likely')<br><input type="radio"/> Yes, I am certain<br><input type="radio"/> Yes, I think so<br><input type="radio"/> No<br><input type="radio"/> Do not know<br><input type="radio"/> No response                                                                                                                                                                                                                                                                                                                                                                                                                                                                                                                                                                                             |
| 715a.i. What was the first thing she did to try to remove the<br>pregnancy?                                                                                                                                                                                                         | (\$ {friend1_abt_mult_yn} = 'yes') or<br>(\$ {friend1_abt_mult_yn} = 'likely')<br><input type="radio"/> Surgical procedure (curettage,<br>MVA, etc.)<br><input type="radio"/> Pills called mifepristone or<br>misoprostol (Cytotec)<br><input type="radio"/> Medicines you take when you<br>have a fever like antibiotics or anti-<br>malarial medicine (Palujecte,<br>Novaquine, Cyphaquine<br><input type="radio"/> Other pills<br><input type="radio"/> Traditional methods that are not<br>inserted into the vagina (herbs,<br>potions, concoctions)<br><input type="radio"/> Ingested industrial products<br>(bleach, Coke-Nescafé mix, etc.)<br><input type="radio"/> Insert materials into the vagina<br>(stem, herb ball, kanigban, etc.)<br><input type="radio"/> Other<br><input type="radio"/> Do not know<br><input type="radio"/> No response |
| 715a.i. What did she do that removed the pregnancy?                                                                                                                                                                                                                                 | (\$ {friend1_abt_mult_yn} = 'no') or<br>(\$ {friend1_abt_mult_yn} = '-88')<br><input type="radio"/> Surgical procedure (curettage,<br>MVA, etc.)<br><input type="radio"/> Pills called mifepristone or<br>misoprostol (Cytotec)<br><input type="radio"/> Medicines you take when you<br>have a fever like antibiotics or anti-<br>malarial medicine (Palujecte,<br>Novaquine, Cyphaquine<br><input type="radio"/> Other pills<br><input type="radio"/> Traditional methods that are not<br>inserted into the vagina (herbs,<br>potions, concoctions)<br><input type="radio"/> Ingested industrial products<br>(bleach, Coke-Nescafé mix, etc.)<br><input type="radio"/> Insert materials into the vagina<br>(stem, herb ball, kanigban, etc.)<br><input type="radio"/> Other<br><input type="radio"/> Do not know<br><input type="radio"/> No response     |

716a.i. Where did she go for the procedure?

```

({friend1_abt_first} = 'surgery') or
({friend1_abt_only} = 'surgery')

```

- ☐ Government hospital
- ☐ Government health center
- ☐ Family planning clinic
- ☐ Mobile clinic (public)
- ☐ Other public
- ☐ Private hospital / clinic
- ☐ Pharmacy
- ☐ Private doctor
- ☐ Mobile clinic (private)
- ☐ Health agent
- ☐ Other private
- ☐ Store
- ☐ Religious organizations
- ☐ Community event
- ☐ Friend / parent
- ☐ Community health agent
- ☐ Street vendor
- ☐ Other
- ☐ Do not know
- ☐ No response

717a.i. Where did she get the medicines?

(\$\{friend1\\_abt\\_first\} = 'pills\\_abortion') or  
 (\$\{friend1\\_abt\\_only\} = 'pills\\_abortion') or  
 (\$\{friend ...

- ☐ Government hospital
- ☐ Government health center
- ☐ Family planning clinic
- ☐ Mobile clinic (public)
- ☐ Other public
- ☐ Private hospital / clinic
- ☐ Pharmacy
- ☐ Private doctor
- ☐ Mobile clinic (private)
- ☐ Health agent
- ☐ Other private
- ☐ Store
- ☐ Religious organizations
- ☐ Community event
- ☐ Friend / parent
- ☐ Community health agent
- ☐ Street vendor
- ☐ Other
- ☐ Do not know
- ☐ No response

718a.i. What was the last thing she did that ultimately removed the pregnancy?

(\$\{friend1\\_abt\\_mult\\_yn\} = 'yes') or  
(\$\{friend1\\_abt\\_mult\\_yn\} = 'likely')

- Surgical procedure (curettage, MVA, etc.)
- Pills called mifepristone or misoprostol (Cytotec)
- Medicines you take when you have a fever like antibiotics or anti-malarial medicine (Palujecte, Novaquine, Cyphaquine)
- Other pills
- Traditional methods that are not inserted into the vagina (herbs, potions, concoctions)
- Ingested industrial products (bleach, Coke-Nescafé mix, etc.)
- Insert materials into the vagina

|                                                                                                                                                                                                                                                                                                                                                                                                                  |                                                                                                                                                                                                                                                                                                                                                                                                                                                                                                                                                                                                                                                                                                                                                                                                                                                                                                                                                                                   |
|------------------------------------------------------------------------------------------------------------------------------------------------------------------------------------------------------------------------------------------------------------------------------------------------------------------------------------------------------------------------------------------------------------------|-----------------------------------------------------------------------------------------------------------------------------------------------------------------------------------------------------------------------------------------------------------------------------------------------------------------------------------------------------------------------------------------------------------------------------------------------------------------------------------------------------------------------------------------------------------------------------------------------------------------------------------------------------------------------------------------------------------------------------------------------------------------------------------------------------------------------------------------------------------------------------------------------------------------------------------------------------------------------------------|
|                                                                                                                                                                                                                                                                                                                                                                                                                  | (stem, herb ball, kanigban, etc.)<br><input type="radio"/> Other<br><input type="radio"/> Do not know<br><input type="radio"/> No response                                                                                                                                                                                                                                                                                                                                                                                                                                                                                                                                                                                                                                                                                                                                                                                                                                        |
| 719a.i. Where did she go for the procedure?                                                                                                                                                                                                                                                                                                                                                                      | \${friend1_abt_last} = 'surgery'<br><input type="radio"/> Government hospital<br><input type="radio"/> Government health center<br><input type="radio"/> Family planning clinic<br><input type="radio"/> Mobile clinic (public)<br><input type="radio"/> Other public<br><input type="radio"/> Private hospital / clinic<br><input type="radio"/> Pharmacy<br><input type="radio"/> Private doctor<br><input type="radio"/> Mobile clinic (private)<br><input type="radio"/> Health agent<br><input type="radio"/> Other private<br><input type="radio"/> Store<br><input type="radio"/> Religious organizations<br><input type="radio"/> Community event<br><input type="radio"/> Friend / parent<br><input type="radio"/> Community health agent<br><input type="radio"/> Street vendor<br><input type="radio"/> Other<br><input type="radio"/> Do not know<br><input type="radio"/> No response                                                                                |
| 720a.i. Where did she get the medicines?                                                                                                                                                                                                                                                                                                                                                                         | (\${friend1_abt_last} = 'pills_abortion') or<br>(\${friend1_abt_last} = 'pills_fever') or<br>(\${friend1_ab ...<br><input type="radio"/> Government hospital<br><input type="radio"/> Government health center<br><input type="radio"/> Family planning clinic<br><input type="radio"/> Mobile clinic (public)<br><input type="radio"/> Other public<br><input type="radio"/> Private hospital / clinic<br><input type="radio"/> Pharmacy<br><input type="radio"/> Private doctor<br><input type="radio"/> Mobile clinic (private)<br><input type="radio"/> Health agent<br><input type="radio"/> Other private<br><input type="radio"/> Store<br><input type="radio"/> Religious organizations<br><input type="radio"/> Community event<br><input type="radio"/> Friend / parent<br><input type="radio"/> Community health agent<br><input type="radio"/> Street vendor<br><input type="radio"/> Other<br><input type="radio"/> Do not know<br><input type="radio"/> No response |
| 721a.i. Did \${friend1_name} have any issues and go to a health facility for treatment in the process of removing the pregnancy?<br><i>If the respondent already reported the friend went to a health facility in the process of removing the pregnancy, we are interested in whether the friend went back to a health facility on a separate occasion to treat complications that she may have experienced.</i> | (\${friend1_abt_yn} = 'yes') or<br>(\${friend1_abt_yn} = 'likely')<br><input type="radio"/> Yes, I am certain<br><input type="radio"/> Yes, I think so<br><input type="radio"/> No<br><input type="radio"/> Do not know<br><input type="radio"/> No response                                                                                                                                                                                                                                                                                                                                                                                                                                                                                                                                                                                                                                                                                                                      |
| 712a.ii. Besides this event, has \${friend1_name} ever done something to regulate her period when she was worried she was pregnant?<br><i>Probe to confirm whether the period regulation was successful. If not, select 'no.'</i>                                                                                                                                                                                | (\${friend1_abt_yn} = 'yes') or<br>(\${friend1_abt_yn} = 'likely')<br><input type="radio"/> Yes, I am certain<br><input type="radio"/> Yes, I think so<br><input type="radio"/> No<br><input type="radio"/> Do not know<br><input type="radio"/> No response                                                                                                                                                                                                                                                                                                                                                                                                                                                                                                                                                                                                                                                                                                                      |

|                                                                                                                                                                                                                          |                                                                                                                                                                                                                                                                                                                                                                                                                                                                                                                                                                                                                                                                                                                                                                                                                                                                                                                                          |
|--------------------------------------------------------------------------------------------------------------------------------------------------------------------------------------------------------------------------|------------------------------------------------------------------------------------------------------------------------------------------------------------------------------------------------------------------------------------------------------------------------------------------------------------------------------------------------------------------------------------------------------------------------------------------------------------------------------------------------------------------------------------------------------------------------------------------------------------------------------------------------------------------------------------------------------------------------------------------------------------------------------------------------------------------------------------------------------------------------------------------------------------------------------------------|
| <p>712a.ii. Has \${friend1_name} ever done something to regulate her period when she was worried she was pregnant?</p> <p><i>Probe to confirm whether the period regulation was successful. If not, select 'no.'</i></p> | <p>((\${friend1_abt_yn} != 'yes') and<br/>         (\${friend1_abt_yn} != 'likely'))</p> <p><input type="radio"/> Yes, I am certain</p> <p><input type="radio"/> Yes, I think so</p> <p><input type="radio"/> No</p> <p><input type="radio"/> Do not know</p> <p><input type="radio"/> No response</p>                                                                                                                                                                                                                                                                                                                                                                                                                                                                                                                                                                                                                                   |
| <p>713a.ii. In what year did this last happen?</p> <p><i>If indicates happened more than once, specify most recent time.</i></p> <p><i>Enter 2020 for 'Do not know' or 'No response'.</i></p>                            | <p>((\${friend1_reg_yn} = 'yes') or<br/>         (\${friend1_reg_yn} = 'likely'))</p> <p>Year: .....</p>                                                                                                                                                                                                                                                                                                                                                                                                                                                                                                                                                                                                                                                                                                                                                                                                                                 |
| <p>714a.ii. Women sometimes do many things to regulate their period. Did \${friend1_name} do more than one thing to try to regulate her period?</p>                                                                      | <p>(((\${friend1_reg_year} &gt; \${friend1_abt_year}) or<br/>         (\${friend1_abt_year} = "")) and<br/>         ((\${friend1_reg_yn} ...</p> <p><input type="radio"/> Yes, I am certain</p> <p><input type="radio"/> Yes, I think so</p> <p><input type="radio"/> No</p> <p><input type="radio"/> Do not know</p> <p><input type="radio"/> No response</p>                                                                                                                                                                                                                                                                                                                                                                                                                                                                                                                                                                           |
| <p>715a.ii. What was the first thing she did to try to regulate her period?</p>                                                                                                                                          | <p>(((\${friend1_reg_year} &gt; \${friend1_abt_year}) or<br/>         (\${friend1_abt_year} = "")) and<br/>         ((\${friend1_reg_mu} ...</p> <p><input type="radio"/> Surgical procedure (curettage, MVA, etc.)</p> <p><input type="radio"/> Pills called mifepristone or misoprostol (Cytotec)</p> <p><input type="radio"/> Medicines you take when you have a fever like antibiotics or anti-malarial medicine (Palujecte, Novaquine, Cyphaquine</p> <p><input type="radio"/> Other pills</p> <p><input type="radio"/> Traditional methods that are not inserted into the vagina (herbs, potions, concoctions)</p> <p><input type="radio"/> Ingested industrial products (bleach, Coke-Nescafé mix, etc.)</p> <p><input type="radio"/> Insert materials into the vagina (stem, herb ball, kanigban, etc.)</p> <p><input type="radio"/> Other</p> <p><input type="radio"/> Do not know</p> <p><input type="radio"/> No response</p> |
| <p>715a.ii. What did she do that regulated her period?</p>                                                                                                                                                               | <p>(((\${friend1_reg_year} &gt; \${friend1_abt_year}) or<br/>         (\${friend1_abt_year} = "")) and<br/>         ((\${friend1_reg_mu} ...</p> <p><input type="radio"/> Surgical procedure (curettage, MVA, etc.)</p> <p><input type="radio"/> Pills called mifepristone or misoprostol (Cytotec)</p> <p><input type="radio"/> Medicines you take when you have a fever like antibiotics or anti-malarial medicine (Palujecte, Novaquine, Cyphaquine</p> <p><input type="radio"/> Other pills</p> <p><input type="radio"/> Traditional methods that are not inserted into the vagina (herbs, potions, concoctions)</p> <p><input type="radio"/> Ingested industrial products (bleach, Coke-Nescafé mix, etc.)</p> <p><input type="radio"/> Insert materials into the vagina (stem, herb ball, kanigban, etc.)</p> <p><input type="radio"/> Other</p> <p><input type="radio"/> Do not know</p> <p><input type="radio"/> No response</p> |



|                                                                                       |                                                                                                                                                                                                                                                                                                                                                                                                                                                                                                                                                                                                                                                                                                                                                                                                                                                                                                                                                                                                                                                                                                                                                                                   |
|---------------------------------------------------------------------------------------|-----------------------------------------------------------------------------------------------------------------------------------------------------------------------------------------------------------------------------------------------------------------------------------------------------------------------------------------------------------------------------------------------------------------------------------------------------------------------------------------------------------------------------------------------------------------------------------------------------------------------------------------------------------------------------------------------------------------------------------------------------------------------------------------------------------------------------------------------------------------------------------------------------------------------------------------------------------------------------------------------------------------------------------------------------------------------------------------------------------------------------------------------------------------------------------|
| 716a.ii. Where did she go for the procedure?                                          | <p>((\${friend1_reg_year} &gt; \${friend1_abt_year}) or<br/>         (\${friend1_abt_year} = "")) and<br/>         ((\${friend1_reg_fi ...</p> <ul style="list-style-type: none"> <li><input type="radio"/> Government hospital</li> <li><input type="radio"/> Government health center</li> <li><input type="radio"/> Family planning clinic</li> <li><input type="radio"/> Mobile clinic (public)</li> <li><input type="radio"/> Other public</li> <li><input type="radio"/> Private hospital / clinic</li> <li><input type="radio"/> Pharmacy</li> <li><input type="radio"/> Private doctor</li> <li><input type="radio"/> Mobile clinic (private)</li> <li><input type="radio"/> Health agent</li> <li><input type="radio"/> Other private</li> <li><input type="radio"/> Store</li> <li><input type="radio"/> Religious organizations</li> <li><input type="radio"/> Community event</li> <li><input type="radio"/> Friend / parent</li> <li><input type="radio"/> Community health agent</li> <li><input type="radio"/> Street vendor</li> <li><input type="radio"/> Other</li> <li><input type="radio"/> Do not know</li> <li><input type="radio"/> No response</li> </ul> |
| 717a.ii. Where did she get the medicines?                                             | <p>((\${friend1_reg_year} &gt; \${friend1_abt_year}) or<br/>         (\${friend1_abt_year} = "")) and<br/>         ((\${friend1_reg_fi ...</p> <ul style="list-style-type: none"> <li><input type="radio"/> Government hospital</li> <li><input type="radio"/> Government health center</li> <li><input type="radio"/> Family planning clinic</li> <li><input type="radio"/> Mobile clinic (public)</li> <li><input type="radio"/> Other public</li> <li><input type="radio"/> Private hospital / clinic</li> <li><input type="radio"/> Pharmacy</li> <li><input type="radio"/> Private doctor</li> <li><input type="radio"/> Mobile clinic (private)</li> <li><input type="radio"/> Health agent</li> <li><input type="radio"/> Other private</li> <li><input type="radio"/> Store</li> <li><input type="radio"/> Religious organizations</li> <li><input type="radio"/> Community event</li> <li><input type="radio"/> Friend / parent</li> <li><input type="radio"/> Community health agent</li> <li><input type="radio"/> Street vendor</li> <li><input type="radio"/> Other</li> <li><input type="radio"/> Do not know</li> <li><input type="radio"/> No response</li> </ul> |
| 718a.ii. What was the last thing she did that ultimately caused her period to return? | <p>((\${friend1_reg_year} &gt; \${friend1_abt_year}) or<br/>         (\${friend1_abt_year} = "")) and<br/>         ((\${friend1_reg_mu ...</p> <ul style="list-style-type: none"> <li><input type="radio"/> Surgical procedure (curettage, MVA, etc.)</li> <li><input type="radio"/> Pills called mifepristone or misoprostol (Cytotec)</li> <li><input type="radio"/> Medicines you take when you have a fever like antibiotics or anti-malarial medicine (Palujecte, Novaquine, Cyphaquine</li> <li><input type="radio"/> Other pills</li> <li><input type="radio"/> Traditional methods that are not inserted into the vagina (herbs, potions, concoctions)</li> <li><input type="radio"/> Ingested industrial products (bleach, Coke-Nescafé mix, etc.)</li> </ul>                                                                                                                                                                                                                                                                                                                                                                                                            |

|                                                                                                                                                                                                                                                                                                                                                                                                                 |                                                                                                                                                                                                                                                                                                                                                                                                                                                                                                                                                                                                                                                                                                                                                                                                                                                                                                                                                                                               |
|-----------------------------------------------------------------------------------------------------------------------------------------------------------------------------------------------------------------------------------------------------------------------------------------------------------------------------------------------------------------------------------------------------------------|-----------------------------------------------------------------------------------------------------------------------------------------------------------------------------------------------------------------------------------------------------------------------------------------------------------------------------------------------------------------------------------------------------------------------------------------------------------------------------------------------------------------------------------------------------------------------------------------------------------------------------------------------------------------------------------------------------------------------------------------------------------------------------------------------------------------------------------------------------------------------------------------------------------------------------------------------------------------------------------------------|
|                                                                                                                                                                                                                                                                                                                                                                                                                 | <input type="radio"/> Insert materials into the vagina (stem, herb ball, kanigban, etc.)<br><input type="radio"/> Other<br><input type="radio"/> Do not know<br><input type="radio"/> No response                                                                                                                                                                                                                                                                                                                                                                                                                                                                                                                                                                                                                                                                                                                                                                                             |
| 719a.ii. Where did she go for the procedure?                                                                                                                                                                                                                                                                                                                                                                    | <p>((\${friend1_reg_year} &gt; \${friend1_abt_year}) or<br/> (\${friend1_abt_year} = "")) and<br/> (\${friend1_reg_la ...</p> <input type="radio"/> Government hospital<br><input type="radio"/> Government health center<br><input type="radio"/> Family planning clinic<br><input type="radio"/> Mobile clinic (public)<br><input type="radio"/> Other public<br><input type="radio"/> Private hospital / clinic<br><input type="radio"/> Pharmacy<br><input type="radio"/> Private doctor<br><input type="radio"/> Mobile clinic (private)<br><input type="radio"/> Health agent<br><input type="radio"/> Other private<br><input type="radio"/> Store<br><input type="radio"/> Religious organizations<br><input type="radio"/> Community event<br><input type="radio"/> Friend / parent<br><input type="radio"/> Community health agent<br><input type="radio"/> Street vendor<br><input type="radio"/> Other<br><input type="radio"/> Do not know<br><input type="radio"/> No response  |
| 720a.ii. Where did she get the medicines?                                                                                                                                                                                                                                                                                                                                                                       | <p>((\${friend1_reg_year} &gt; \${friend1_abt_year}) or<br/> (\${friend1_abt_year} = "")) and<br/> ((\${friend1_reg_la ...</p> <input type="radio"/> Government hospital<br><input type="radio"/> Government health center<br><input type="radio"/> Family planning clinic<br><input type="radio"/> Mobile clinic (public)<br><input type="radio"/> Other public<br><input type="radio"/> Private hospital / clinic<br><input type="radio"/> Pharmacy<br><input type="radio"/> Private doctor<br><input type="radio"/> Mobile clinic (private)<br><input type="radio"/> Health agent<br><input type="radio"/> Other private<br><input type="radio"/> Store<br><input type="radio"/> Religious organizations<br><input type="radio"/> Community event<br><input type="radio"/> Friend / parent<br><input type="radio"/> Community health agent<br><input type="radio"/> Street vendor<br><input type="radio"/> Other<br><input type="radio"/> Do not know<br><input type="radio"/> No response |
| 721a.ii. Did \${friend1_name} have any issues and go to a health facility for treatment in the process of regulating her period?<br><i>If the respondent already reported the friend went to a health facility in the process of regulating her period, we are interested in whether the friend went back to a health facility on a separate occasion to treat complications that she may have experienced.</i> | <p>((\${friend1_reg_year} &gt; \${friend1_abt_year}) or<br/> (\${friend1_abt_year} = "")) and<br/> ((\${friend1_reg_yn ...</p> <input type="radio"/> Yes, I am certain<br><input type="radio"/> Yes, I think so<br><input type="radio"/> No<br><input type="radio"/> Do not know<br><input type="radio"/> No response                                                                                                                                                                                                                                                                                                                                                                                                                                                                                                                                                                                                                                                                         |
| 712b.i. Now I want to ask some more questions about \${friend2_name}. Has she ever done something to remove a pregnancy when she was pregnant or worried she was pregnant?<br><i>Probe to confirm whether the pregnancy removal was successful. If not,</i>                                                                                                                                                     | <input type="radio"/> Yes, I am certain<br><input type="radio"/> Yes, I think so<br><input type="radio"/> No<br><input type="radio"/> Do not know                                                                                                                                                                                                                                                                                                                                                                                                                                                                                                                                                                                                                                                                                                                                                                                                                                             |

|                                                                                                                                                                         |                                                                                                                                                                                                                                                                                                                                                                                                                                                                                                                                                                                                                                                                                                                                                                                                                                                                |
|-------------------------------------------------------------------------------------------------------------------------------------------------------------------------|----------------------------------------------------------------------------------------------------------------------------------------------------------------------------------------------------------------------------------------------------------------------------------------------------------------------------------------------------------------------------------------------------------------------------------------------------------------------------------------------------------------------------------------------------------------------------------------------------------------------------------------------------------------------------------------------------------------------------------------------------------------------------------------------------------------------------------------------------------------|
| <i>select 'no.'</i>                                                                                                                                                     | <input type="radio"/> No response<br><div style="text-align: right;">({friend2_abt_yn} = 'yes') or<br/>( {friend2_abt_yn} = 'likely')</div>                                                                                                                                                                                                                                                                                                                                                                                                                                                                                                                                                                                                                                                                                                                    |
| 713b.i. In what year did this last happen?<br><i>If indicates happened more than once, specify most recent time.<br/>Enter 2020 for 'Do not know' or 'No response'.</i> | Year: _____<br><div style="text-align: right;">({friend2_abt_yn} = 'yes') or<br/>( {friend2_abt_yn} = 'likely')</div>                                                                                                                                                                                                                                                                                                                                                                                                                                                                                                                                                                                                                                                                                                                                          |
| 714b.i. Women sometimes do many things to stop a pregnancy from continuing. Did {friend2_name} do more than one thing to try to remove the pregnancy?                   | <input type="radio"/> Yes, I am certain<br><input type="radio"/> Yes, I think so<br><input type="radio"/> No<br><input type="radio"/> Do not know<br><input type="radio"/> No response                                                                                                                                                                                                                                                                                                                                                                                                                                                                                                                                                                                                                                                                         |
| 715b.i. What was the first thing she did to try to remove the pregnancy?                                                                                                | <div style="text-align: right;">({friend2_abt_mult_yn} = 'yes') or<br/>( {friend2_abt_mult_yn} = 'likely')</div> <input type="radio"/> Surgical procedure (curettage, MVA, etc.)<br><input type="radio"/> Pills called mifepristone or misoprostol (Cytotec)<br><input type="radio"/> Medicines you take when you have a fever like antibiotics or anti-malarial medicine (Palujecte, Novaquine, Cyphaquine)<br><input type="radio"/> Other pills<br><input type="radio"/> Traditional methods that are not inserted into the vagina (herbs, potions, concoctions)<br><input type="radio"/> Ingested industrial products (bleach, Coke-Nescafé mix, etc.)<br><input type="radio"/> Insert materials into the vagina (stem, herb ball, kanigban, etc.)<br><input type="radio"/> Other<br><input type="radio"/> Do not know<br><input type="radio"/> No response |
| 715b.i. What did she do that removed the pregnancy?                                                                                                                     | <div style="text-align: right;">({friend2_abt_mult_yn} = 'no') or<br/>( {friend2_abt_mult_yn} = '-88')</div> <input type="radio"/> Surgical procedure (curettage, MVA, etc.)<br><input type="radio"/> Pills called mifepristone or misoprostol (Cytotec)<br><input type="radio"/> Medicines you take when you have a fever like antibiotics or anti-malarial medicine (Palujecte, Novaquine, Cyphaquine)<br><input type="radio"/> Other pills<br><input type="radio"/> Traditional methods that are not inserted into the vagina (herbs, potions, concoctions)<br><input type="radio"/> Ingested industrial products (bleach, Coke-Nescafé mix, etc.)<br><input type="radio"/> Insert materials into the vagina (stem, herb ball, kanigban, etc.)<br><input type="radio"/> Other<br><input type="radio"/> Do not know<br><input type="radio"/> No response     |
| 716b.i. Where did she go for the procedure?                                                                                                                             | <div style="text-align: right;">({friend2_abt_first} = 'surgery') or<br/>( {friend2_abt_only} = 'surgery')</div> <input type="radio"/> Government hospital<br><input type="radio"/> Government health center<br><input type="radio"/> Family planning clinic<br><input type="radio"/> Mobile clinic (public)<br><input type="radio"/> Other public<br><input type="radio"/> Private hospital / clinic                                                                                                                                                                                                                                                                                                                                                                                                                                                          |

|                                                                                |                                                                                                                                                                                                                                                                                                                                                                                                                                                                                                                                                                                                                                                                                                                                                                                                                                                                                                                                                                                                                             |
|--------------------------------------------------------------------------------|-----------------------------------------------------------------------------------------------------------------------------------------------------------------------------------------------------------------------------------------------------------------------------------------------------------------------------------------------------------------------------------------------------------------------------------------------------------------------------------------------------------------------------------------------------------------------------------------------------------------------------------------------------------------------------------------------------------------------------------------------------------------------------------------------------------------------------------------------------------------------------------------------------------------------------------------------------------------------------------------------------------------------------|
|                                                                                | <input type="radio"/> Pharmacy<br><input type="radio"/> Private doctor<br><input type="radio"/> Mobile clinic (private)<br><input type="radio"/> Health agent<br><input type="radio"/> Other private<br><input type="radio"/> Store<br><input type="radio"/> Religious organizations<br><input type="radio"/> Community event<br><input type="radio"/> Friend / parent<br><input type="radio"/> Community health agent<br><input type="radio"/> Street vendor<br><input type="radio"/> Other<br><input type="radio"/> Do not know<br><input type="radio"/> No response                                                                                                                                                                                                                                                                                                                                                                                                                                                      |
| 717b.i. Where did she get the medicines?                                       | <p>           ({friend2_abt_first} = 'pills_abortion') or<br/>           ({friend2_abt_only} = 'pills_abortion') or<br/>           ({friend ...         </p> <input type="radio"/> Government hospital<br><input type="radio"/> Government health center<br><input type="radio"/> Family planning clinic<br><input type="radio"/> Mobile clinic (public)<br><input type="radio"/> Other public<br><input type="radio"/> Private hospital / clinic<br><input type="radio"/> Pharmacy<br><input type="radio"/> Private doctor<br><input type="radio"/> Mobile clinic (private)<br><input type="radio"/> Health agent<br><input type="radio"/> Other private<br><input type="radio"/> Store<br><input type="radio"/> Religious organizations<br><input type="radio"/> Community event<br><input type="radio"/> Friend / parent<br><input type="radio"/> Community health agent<br><input type="radio"/> Street vendor<br><input type="radio"/> Other<br><input type="radio"/> Do not know<br><input type="radio"/> No response |
| 718b.i. What was the last thing she did that ultimately removed the pregnancy? | <p>           ({friend2_abt_mult_yn} = 'yes') or<br/>           ({friend2_abt_mult_yn} = 'likely')         </p> <input type="radio"/> Surgical procedure (curettage, MVA, etc.)<br><input type="radio"/> Pills called mifepristone or misoprostol (Cytotec)<br><input type="radio"/> Medicines you take when you have a fever like antibiotics or anti-malarial medicine (Palujecte, Novaquine, Cyphaquine)<br><input type="radio"/> Other pills<br><input type="radio"/> Traditional methods that are not inserted into the vagina (herbs, potions, concoctions)<br><input type="radio"/> Ingested industrial products (bleach, Coke-Nescafé mix, etc.)<br><input type="radio"/> Insert materials into the vagina (stem, herb ball, kanigban, etc.)<br><input type="radio"/> Other<br><input type="radio"/> Do not know<br><input type="radio"/> No response                                                                                                                                                               |
| 719b.i. Where did she go for the procedure?                                    | <p>           \${friend2_abt_last} = 'surgery'         </p> <input type="radio"/> Government hospital<br><input type="radio"/> Government health center<br><input type="radio"/> Family planning clinic                                                                                                                                                                                                                                                                                                                                                                                                                                                                                                                                                                                                                                                                                                                                                                                                                     |

|                                                                                                                                                                                                                                                                                                                                                                                                                |                                                                                                                                                                                                                                                                                                                                                                                                                                                                                                                                                                                                                                                                                                                                                                                                                                                                                                                                                                                                                             |
|----------------------------------------------------------------------------------------------------------------------------------------------------------------------------------------------------------------------------------------------------------------------------------------------------------------------------------------------------------------------------------------------------------------|-----------------------------------------------------------------------------------------------------------------------------------------------------------------------------------------------------------------------------------------------------------------------------------------------------------------------------------------------------------------------------------------------------------------------------------------------------------------------------------------------------------------------------------------------------------------------------------------------------------------------------------------------------------------------------------------------------------------------------------------------------------------------------------------------------------------------------------------------------------------------------------------------------------------------------------------------------------------------------------------------------------------------------|
|                                                                                                                                                                                                                                                                                                                                                                                                                | <input type="radio"/> Mobile clinic (public)<br><input type="radio"/> Other public<br><input type="radio"/> Private hospital / clinic<br><input type="radio"/> Pharmacy<br><input type="radio"/> Private doctor<br><input type="radio"/> Mobile clinic (private)<br><input type="radio"/> Health agent<br><input type="radio"/> Other private<br><input type="radio"/> Store<br><input type="radio"/> Religious organizations<br><input type="radio"/> Community event<br><input type="radio"/> Friend / parent<br><input type="radio"/> Community health agent<br><input type="radio"/> Street vendor<br><input type="radio"/> Other<br><input type="radio"/> Do not know<br><input type="radio"/> No response                                                                                                                                                                                                                                                                                                             |
| 720b.i. Where did she get the medicines?                                                                                                                                                                                                                                                                                                                                                                       | <p>           ({friend2_abt_last} = 'pills_abortion') or<br/>           ({friend2_abt_last} = 'pills_fever') or<br/>           ({friend2_ab ...         </p> <input type="radio"/> Government hospital<br><input type="radio"/> Government health center<br><input type="radio"/> Family planning clinic<br><input type="radio"/> Mobile clinic (public)<br><input type="radio"/> Other public<br><input type="radio"/> Private hospital / clinic<br><input type="radio"/> Pharmacy<br><input type="radio"/> Private doctor<br><input type="radio"/> Mobile clinic (private)<br><input type="radio"/> Health agent<br><input type="radio"/> Other private<br><input type="radio"/> Store<br><input type="radio"/> Religious organizations<br><input type="radio"/> Community event<br><input type="radio"/> Friend / parent<br><input type="radio"/> Community health agent<br><input type="radio"/> Street vendor<br><input type="radio"/> Other<br><input type="radio"/> Do not know<br><input type="radio"/> No response |
| 721b.i. Did {friend2_name} have any issues and go to a health facility for treatment in the process of removing the pregnancy?<br><i>If the respondent already reported the friend went to a health facility in the process of removing the pregnancy, we are interested in whether the friend went back to a health facility on a separate occasion to treat complications that she may have experienced.</i> | <p>           ({friend2_abt_yn} = 'yes') or<br/>           ({friend2_abt_yn} = 'likely')         </p> <input type="radio"/> Yes, I am certain<br><input type="radio"/> Yes, I think so<br><input type="radio"/> No<br><input type="radio"/> Do not know<br><input type="radio"/> No response                                                                                                                                                                                                                                                                                                                                                                                                                                                                                                                                                                                                                                                                                                                                |
| 712b.ii. Besides this event, has {friend2_name} ever done something to regulate her period when she was worried she was pregnant?<br><i>Probe to confirm whether the period regulation was successful. If not, select 'no.'</i>                                                                                                                                                                                | <p>           ({friend2_abt_yn} = 'yes') or<br/>           ({friend2_abt_yn} = 'likely')         </p> <input type="radio"/> Yes, I am certain<br><input type="radio"/> Yes, I think so<br><input type="radio"/> No<br><input type="radio"/> Do not know<br><input type="radio"/> No response                                                                                                                                                                                                                                                                                                                                                                                                                                                                                                                                                                                                                                                                                                                                |
| 712b.ii. Has {friend2_name} ever done something to regulate her period when she was worried she was pregnant?<br><i>Probe to confirm whether the period regulation was successful. If not, select 'no.'</i>                                                                                                                                                                                                    | <p>           ({friend2_abt_yn} != 'yes') and<br/>           ({friend2_abt_yn} != 'likely')         </p> <input type="radio"/> Yes, I am certain<br><input type="radio"/> Yes, I think so<br><input type="radio"/> No<br><input type="radio"/> Do not know<br><input type="radio"/> No response                                                                                                                                                                                                                                                                                                                                                                                                                                                                                                                                                                                                                                                                                                                             |
| 713b.ii. In what year did this last happen?                                                                                                                                                                                                                                                                                                                                                                    | <p>           ({friend2_reg_yn} = 'yes') or         </p>                                                                                                                                                                                                                                                                                                                                                                                                                                                                                                                                                                                                                                                                                                                                                                                                                                                                                                                                                                    |

|                                                                                                                                                                                                                                                                                                |                                                                                                                                                                                                                                                                                                                                                                                                                                                                                                                                                                                                                                                                                                                                                                                                                                                                                                                    |
|------------------------------------------------------------------------------------------------------------------------------------------------------------------------------------------------------------------------------------------------------------------------------------------------|--------------------------------------------------------------------------------------------------------------------------------------------------------------------------------------------------------------------------------------------------------------------------------------------------------------------------------------------------------------------------------------------------------------------------------------------------------------------------------------------------------------------------------------------------------------------------------------------------------------------------------------------------------------------------------------------------------------------------------------------------------------------------------------------------------------------------------------------------------------------------------------------------------------------|
| <p><i>If indicates happened more than once, specify most recent time.</i></p> <p><i>Enter 2020 for 'Do not know' or 'No response'.</i></p> <p>714b.ii. Women sometimes do many things to regulate their period. Did \${friend2_name} do more than one thing to try to regulate her period?</p> | <p>(({friend2_reg_yn} = 'likely')<br/> Year:--<br/> (({friend2_reg_year} &gt; \${friend2_abt_year}) or<br/> (\${friend2_abt_year} = "")) and<br/> (({friend2_reg_yn} ...</p> <p><input type="radio"/> Yes, I am certain</p> <p><input type="radio"/> Yes, I think so</p> <p><input type="radio"/> No</p> <p><input type="radio"/> Do not know</p> <p><input type="radio"/> No response</p>                                                                                                                                                                                                                                                                                                                                                                                                                                                                                                                         |
| <p>715b.ii. What was the first thing she did to try to regulate her period?</p>                                                                                                                                                                                                                | <p>(({friend2_reg_year} &gt; \${friend2_abt_year}) or<br/> (\${friend2_abt_year} = "")) and<br/> (({friend2_reg_mu ...</p> <p><input type="radio"/> Surgical procedure (curettage, MVA, etc.)</p> <p><input type="radio"/> Pills called mifepristone or misoprostol (Cytotec)</p> <p><input type="radio"/> Medicines you take when you have a fever like antibiotics or anti-malarial medicine (Palujecte, Novaquine, Cyphaquine</p> <p><input type="radio"/> Other pills</p> <p><input type="radio"/> Traditional methods that are not inserted into the vagina (herbs, potions, concoctions)</p> <p><input type="radio"/> Ingested industrial products (bleach, Coke-Nescafé mix, etc.)</p> <p><input type="radio"/> Insert materials into the vagina (stem, herb ball, kanigban, etc.)</p> <p><input type="radio"/> Other</p> <p><input type="radio"/> Do not know</p> <p><input type="radio"/> No response</p> |
| <p>715b.ii. What did she do that regulated her period?</p>                                                                                                                                                                                                                                     | <p>(({friend2_reg_year} &gt; \${friend2_abt_year}) or<br/> (\${friend2_abt_year} = "")) and<br/> (({friend2_reg_mu ...</p> <p><input type="radio"/> Surgical procedure (curettage, MVA, etc.)</p> <p><input type="radio"/> Pills called mifepristone or misoprostol (Cytotec)</p> <p><input type="radio"/> Medicines you take when you have a fever like antibiotics or anti-malarial medicine (Palujecte, Novaquine, Cyphaquine</p> <p><input type="radio"/> Other pills</p> <p><input type="radio"/> Traditional methods that are not inserted into the vagina (herbs, potions, concoctions)</p> <p><input type="radio"/> Ingested industrial products (bleach, Coke-Nescafé mix, etc.)</p> <p><input type="radio"/> Insert materials into the vagina (stem, herb ball, kanigban, etc.)</p> <p><input type="radio"/> Other</p> <p><input type="radio"/> Do not know</p> <p><input type="radio"/> No response</p> |
| <p>716b.ii. Where did she go for the procedure?</p>                                                                                                                                                                                                                                            | <p>(({friend2_reg_year} &gt; \${friend2_abt_year}) or<br/> (\${friend2_abt_year} = "")) and<br/> (({friend2_reg_fi ...</p> <p><input type="radio"/> Government hospital</p> <p><input type="radio"/> Government health center</p> <p><input type="radio"/> Family planning clinic</p> <p><input type="radio"/> Mobile clinic (public)</p> <p><input type="radio"/> Other public</p> <p><input type="radio"/> Private hospital / clinic</p>                                                                                                                                                                                                                                                                                                                                                                                                                                                                         |

|                                                                                       |                                                                                                                                                                                                                                                                                                                                                                                                                                                                                                                                                                                                                                                                                                                                                                                                                                                                                                                                                                                          |
|---------------------------------------------------------------------------------------|------------------------------------------------------------------------------------------------------------------------------------------------------------------------------------------------------------------------------------------------------------------------------------------------------------------------------------------------------------------------------------------------------------------------------------------------------------------------------------------------------------------------------------------------------------------------------------------------------------------------------------------------------------------------------------------------------------------------------------------------------------------------------------------------------------------------------------------------------------------------------------------------------------------------------------------------------------------------------------------|
|                                                                                       | <input type="radio"/> Pharmacy<br><input type="radio"/> Private doctor<br><input type="radio"/> Mobile clinic (private)<br><input type="radio"/> Health agent<br><input type="radio"/> Other private<br><input type="radio"/> Store<br><input type="radio"/> Religious organizations<br><input type="radio"/> Community event<br><input type="radio"/> Friend / parent<br><input type="radio"/> Community health agent<br><input type="radio"/> Street vendor<br><input type="radio"/> Other<br><input type="radio"/> Do not know<br><input type="radio"/> No response                                                                                                                                                                                                                                                                                                                                                                                                                   |
| 717b.ii. Where did she get the medicines?                                             | <p>(({\$friend2_reg_year} &gt; {\$friend2_abt_year}) or<br/> ({friend2_abt_year} = "")) and<br/> ({friend2_reg_fi ...</p> <input type="radio"/> Government hospital<br><input type="radio"/> Government health center<br><input type="radio"/> Family planning clinic<br><input type="radio"/> Mobile clinic (public)<br><input type="radio"/> Other public<br><input type="radio"/> Private hospital / clinic<br><input type="radio"/> Pharmacy<br><input type="radio"/> Private doctor<br><input type="radio"/> Mobile clinic (private)<br><input type="radio"/> Health agent<br><input type="radio"/> Other private<br><input type="radio"/> Store<br><input type="radio"/> Religious organizations<br><input type="radio"/> Community event<br><input type="radio"/> Friend / parent<br><input type="radio"/> Community health agent<br><input type="radio"/> Street vendor<br><input type="radio"/> Other<br><input type="radio"/> Do not know<br><input type="radio"/> No response |
| 718b.ii. What was the last thing she did that ultimately caused her period to return? | <p>(({\$friend2_reg_year} &gt; {\$friend2_abt_year}) or<br/> ({friend2_abt_year} = "")) and<br/> ({friend2_reg_mu ...</p> <input type="radio"/> Surgical procedure (curettage, MVA, etc.)<br><input type="radio"/> Pills called mifepristone or misoprostol (Cytotec)<br><input type="radio"/> Medicines you take when you have a fever like antibiotics or anti-malarial medicine (Palujecte, Novaquine, Cyphaquine)<br><input type="radio"/> Other pills<br><input type="radio"/> Traditional methods that are not inserted into the vagina (herbs, potions, concoctions)<br><input type="radio"/> Ingested industrial products (bleach, Coke-Nescafé mix, etc.)<br><input type="radio"/> Insert materials into the vagina (stem, herb ball, kanigban, etc.)<br><input type="radio"/> Other<br><input type="radio"/> Do not know<br><input type="radio"/> No response                                                                                                                  |
| 719b.ii. Where did she go for the procedure?                                          | <p>(({\$friend2_reg_year} &gt; {\$friend2_abt_year}) or<br/> ({friend2_abt_year} = "")) and<br/> ({friend2_reg_las ...</p> <input type="radio"/> Government hospital                                                                                                                                                                                                                                                                                                                                                                                                                                                                                                                                                                                                                                                                                                                                                                                                                     |

|                                                                                                                                                                                                                                                                                                                                                                                                                 |                                                                                                                                                                                                                                                                                                                                                                                                                                                                                                                                                                                                                                                                                                                                                                                                                                                                                                                                                                                              |
|-----------------------------------------------------------------------------------------------------------------------------------------------------------------------------------------------------------------------------------------------------------------------------------------------------------------------------------------------------------------------------------------------------------------|----------------------------------------------------------------------------------------------------------------------------------------------------------------------------------------------------------------------------------------------------------------------------------------------------------------------------------------------------------------------------------------------------------------------------------------------------------------------------------------------------------------------------------------------------------------------------------------------------------------------------------------------------------------------------------------------------------------------------------------------------------------------------------------------------------------------------------------------------------------------------------------------------------------------------------------------------------------------------------------------|
|                                                                                                                                                                                                                                                                                                                                                                                                                 | <input type="radio"/> Government health center<br><input type="radio"/> Family planning clinic<br><input type="radio"/> Mobile clinic (public)<br><input type="radio"/> Other public<br><input type="radio"/> Private hospital / clinic<br><input type="radio"/> Pharmacy<br><input type="radio"/> Private doctor<br><input type="radio"/> Mobile clinic (private)<br><input type="radio"/> Health agent<br><input type="radio"/> Other private<br><input type="radio"/> Store<br><input type="radio"/> Religious organizations<br><input type="radio"/> Community event<br><input type="radio"/> Friend / parent<br><input type="radio"/> Community health agent<br><input type="radio"/> Street vendor<br><input type="radio"/> Other<br><input type="radio"/> Do not know<br><input type="radio"/> No response                                                                                                                                                                            |
| 720b.ii. Where did she get the medicines?                                                                                                                                                                                                                                                                                                                                                                       | <p>(({\$friend2_reg_year} &gt; {\$friend2_abt_year}) or<br/> ({\$friend2_abt_year} = "")) and<br/> ({\$friend2_reg_la ...</p> <input type="radio"/> Government hospital<br><input type="radio"/> Government health center<br><input type="radio"/> Family planning clinic<br><input type="radio"/> Mobile clinic (public)<br><input type="radio"/> Other public<br><input type="radio"/> Private hospital / clinic<br><input type="radio"/> Pharmacy<br><input type="radio"/> Private doctor<br><input type="radio"/> Mobile clinic (private)<br><input type="radio"/> Health agent<br><input type="radio"/> Other private<br><input type="radio"/> Store<br><input type="radio"/> Religious organizations<br><input type="radio"/> Community event<br><input type="radio"/> Friend / parent<br><input type="radio"/> Community health agent<br><input type="radio"/> Street vendor<br><input type="radio"/> Other<br><input type="radio"/> Do not know<br><input type="radio"/> No response |
| 721b.ii. Did {\$friend2_name} have any issues and go to a health facility for treatment in the process of regulating her period?<br><i>If the respondent already reported the friend went to a health facility in the process of regulating her period, we are interested in whether the friend went back to a health facility on a separate occasion to treat complications that she may have experienced.</i> | <p>(({\$friend2_reg_year} &gt; {\$friend2_abt_year}) or<br/> ({\$friend2_abt_year} = "")) and<br/> ({\$friend2_reg_yn ...</p> <input type="radio"/> Yes, I am certain<br><input type="radio"/> Yes, I think so<br><input type="radio"/> No<br><input type="radio"/> Do not know<br><input type="radio"/> No response                                                                                                                                                                                                                                                                                                                                                                                                                                                                                                                                                                                                                                                                         |
| 722a. Now I would like to ask about your own experience. Have you ever done something to remove a pregnancy when you were pregnant or worried you were pregnant?<br><i>Probe to confirm whether the pregnancy removal was successful. If not, select 'no.'</i>                                                                                                                                                  | <input type="radio"/> Yes<br><input type="radio"/> No<br><input type="radio"/> No response                                                                                                                                                                                                                                                                                                                                                                                                                                                                                                                                                                                                                                                                                                                                                                                                                                                                                                   |
| 723a. In what year did this last happen?<br><i>If indicates happened more than once, specify most recent time.<br/> Enter 2020 for 'Do not know' or 'No response'.</i>                                                                                                                                                                                                                                          | <p style="text-align: right;">({\$self_abt_yn} = 'yes')</p> Year: .....                                                                                                                                                                                                                                                                                                                                                                                                                                                                                                                                                                                                                                                                                                                                                                                                                                                                                                                      |
| 724a. Did you do more than one thing to try to remove the pregnancy?                                                                                                                                                                                                                                                                                                                                            | <p style="text-align: right;">({\$self_abt_yn} = 'yes')</p> <input type="radio"/> Yes<br><input type="radio"/> No<br><input type="radio"/> No response                                                                                                                                                                                                                                                                                                                                                                                                                                                                                                                                                                                                                                                                                                                                                                                                                                       |



|                                           |                                                                                                                                                                                                                                                                                                                                                                                                                                                                                                                                                                                                                                                                                                                                                                                                                                                                                                                                                                                                                                                                                                                   |
|-------------------------------------------|-------------------------------------------------------------------------------------------------------------------------------------------------------------------------------------------------------------------------------------------------------------------------------------------------------------------------------------------------------------------------------------------------------------------------------------------------------------------------------------------------------------------------------------------------------------------------------------------------------------------------------------------------------------------------------------------------------------------------------------------------------------------------------------------------------------------------------------------------------------------------------------------------------------------------------------------------------------------------------------------------------------------------------------------------------------------------------------------------------------------|
| 725a. What did you first do?              | <p>(\${self_abt_mult_yn} = 'yes')</p> <ul style="list-style-type: none"> <li><input type="radio"/> Surgical procedure (curettage, MVA, etc.)</li> <li><input type="radio"/> Pills called mifepristone or misoprostol (Cytotec)</li> <li><input type="radio"/> Medicines you take when you have a fever like antibiotics or anti-malarial medicine (Palujecte, Novaquine, Cyphaquine)</li> <li><input type="radio"/> Other pills</li> <li><input type="radio"/> Traditional methods that are not inserted into the vagina (herbs, potions, concoctions)</li> <li><input type="radio"/> Ingested industrial products (bleach, Coke-Nescafé mix, etc.)</li> <li><input type="radio"/> Insert materials into the vagina (stem, herb ball, kanigban, etc.)</li> <li><input type="radio"/> Other</li> <li><input type="radio"/> Do not know</li> <li><input type="radio"/> No response</li> </ul>                                                                                                                                                                                                                       |
| 725a. What did you do?                    | <p>(\${self_abt_mult_yn} = 'no')</p> <ul style="list-style-type: none"> <li><input type="radio"/> Surgical procedure (curettage, MVA, etc.)</li> <li><input type="radio"/> Pills called mifepristone or misoprostol (Cytotec)</li> <li><input type="radio"/> Medicines you take when you have a fever like antibiotics or anti-malarial medicine (Palujecte, Novaquine, Cyphaquine)</li> <li><input type="radio"/> Other pills</li> <li><input type="radio"/> Traditional methods that are not inserted into the vagina (herbs, potions, concoctions)</li> <li><input type="radio"/> Ingested industrial products (bleach, Coke-Nescafé mix, etc.)</li> <li><input type="radio"/> Insert materials into the vagina (stem, herb ball, kanigban, etc.)</li> <li><input type="radio"/> Other</li> <li><input type="radio"/> Do not know</li> <li><input type="radio"/> No response</li> </ul>                                                                                                                                                                                                                        |
| 726a. Where did you go for the procedure? | <p>(\${self_abt_first} = 'surgery') or<br/>(\${self_abt_only} = 'surgery')</p> <ul style="list-style-type: none"> <li><input type="radio"/> Government hospital</li> <li><input type="radio"/> Government health center</li> <li><input type="radio"/> Family planning clinic</li> <li><input type="radio"/> Mobile clinic (public)</li> <li><input type="radio"/> Other public</li> <li><input type="radio"/> Private hospital / clinic</li> <li><input type="radio"/> Pharmacy</li> <li><input type="radio"/> Private doctor</li> <li><input type="radio"/> Mobile clinic (private)</li> <li><input type="radio"/> Health agent</li> <li><input type="radio"/> Other private</li> <li><input type="radio"/> Store</li> <li><input type="radio"/> Religious organizations</li> <li><input type="radio"/> Community event</li> <li><input type="radio"/> Friend / parent</li> <li><input type="radio"/> Community health agent</li> <li><input type="radio"/> Street vendor</li> <li><input type="radio"/> Other</li> <li><input type="radio"/> Do not know</li> <li><input type="radio"/> No response</li> </ul> |

|                                                                                     |                                                                                                                                                                                                                                                                                                                                                                                                                                                                                                                                                                                                                                                                                                                                                                                                                                                                                                                                                                                                                                                                                                                                                                                                                                             |
|-------------------------------------------------------------------------------------|---------------------------------------------------------------------------------------------------------------------------------------------------------------------------------------------------------------------------------------------------------------------------------------------------------------------------------------------------------------------------------------------------------------------------------------------------------------------------------------------------------------------------------------------------------------------------------------------------------------------------------------------------------------------------------------------------------------------------------------------------------------------------------------------------------------------------------------------------------------------------------------------------------------------------------------------------------------------------------------------------------------------------------------------------------------------------------------------------------------------------------------------------------------------------------------------------------------------------------------------|
| <p>727a. Where did you get the medicines?</p>                                       | <p>                     ({\$self_abt_first} = 'pills_abortion') or<br/>                     ({\$self_abt_only} = 'pills_abortion') or<br/>                     ({\$self_abt_fir ...                 </p> <ul style="list-style-type: none"> <li><input type="radio"/> Government hospital</li> <li><input type="radio"/> Government health center</li> <li><input type="radio"/> Family planning clinic</li> <li><input type="radio"/> Mobile clinic (public)</li> <li><input type="radio"/> Other public</li> <li><input type="radio"/> Private hospital / clinic</li> <li><input type="radio"/> Pharmacy</li> <li><input type="radio"/> Private doctor</li> <li><input type="radio"/> Mobile clinic (private)</li> <li><input type="radio"/> Health agent</li> <li><input type="radio"/> Other private</li> <li><input type="radio"/> Store</li> <li><input type="radio"/> Religious organizations</li> <li><input type="radio"/> Community event</li> <li><input type="radio"/> Friend / parent</li> <li><input type="radio"/> Community health agent</li> <li><input type="radio"/> Street vendor</li> <li><input type="radio"/> Other</li> <li><input type="radio"/> Do not know</li> <li><input type="radio"/> No response</li> </ul> |
| <p>728a. What was the last thing you did that ultimately removed the pregnancy?</p> | <p>                     ({\$self_abt_mult_yn} = 'yes')                 </p> <ul style="list-style-type: none"> <li><input type="radio"/> Surgical procedure (curettage, MVA, etc.)</li> <li><input type="radio"/> Pills called mifepristone or misoprostol (Cytotec)</li> <li><input type="radio"/> Medicines you take when you have a fever like antibiotics or anti-malarial medicine (Palujecte, Novaquine, Cyphaquine)</li> <li><input type="radio"/> Other pills</li> <li><input type="radio"/> Traditional methods that are not inserted into the vagina (herbs, potions, concoctions)</li> <li><input type="radio"/> Ingested industrial products (bleach, Coke-Nescafé mix, etc.)</li> <li><input type="radio"/> Insert materials into the vagina (stem, herb ball, kanigban, etc.)</li> <li><input type="radio"/> Other</li> <li><input type="radio"/> Do not know</li> <li><input type="radio"/> No response</li> </ul>                                                                                                                                                                                                                                                                                                           |
| <p>729a. Where did you go for the procedure?</p>                                    | <p>                     {\$self_abt_last} = 'surgery'                 </p> <ul style="list-style-type: none"> <li><input type="radio"/> Government hospital</li> <li><input type="radio"/> Government health center</li> <li><input type="radio"/> Family planning clinic</li> <li><input type="radio"/> Mobile clinic (public)</li> <li><input type="radio"/> Other public</li> <li><input type="radio"/> Private hospital / clinic</li> <li><input type="radio"/> Pharmacy</li> <li><input type="radio"/> Private doctor</li> <li><input type="radio"/> Mobile clinic (private)</li> <li><input type="radio"/> Health agent</li> <li><input type="radio"/> Other private</li> <li><input type="radio"/> Store</li> <li><input type="radio"/> Religious organizations</li> <li><input type="radio"/> Community event</li> <li><input type="radio"/> Friend / parent</li> <li><input type="radio"/> Community health agent</li> <li><input type="radio"/> Street vendor</li> </ul>                                                                                                                                                                                                                                                          |

|                                                                                                                                                                                                                                                                                                                                                                                     |                                                                                                                                                                                                                                                                                                                                                                                                                                                                                                                                                                                                                                                                                                                                                                                                                                                                                                                                                                                                                                                                                      |
|-------------------------------------------------------------------------------------------------------------------------------------------------------------------------------------------------------------------------------------------------------------------------------------------------------------------------------------------------------------------------------------|--------------------------------------------------------------------------------------------------------------------------------------------------------------------------------------------------------------------------------------------------------------------------------------------------------------------------------------------------------------------------------------------------------------------------------------------------------------------------------------------------------------------------------------------------------------------------------------------------------------------------------------------------------------------------------------------------------------------------------------------------------------------------------------------------------------------------------------------------------------------------------------------------------------------------------------------------------------------------------------------------------------------------------------------------------------------------------------|
|                                                                                                                                                                                                                                                                                                                                                                                     | <input type="radio"/> Other<br><input type="radio"/> Do not know                                                                                                                                                                                                                                                                                                                                                                                                                                                                                                                                                                                                                                                                                                                                                                                                                                                                                                                                                                                                                     |
| 730a. Where did you get the medicines?                                                                                                                                                                                                                                                                                                                                              | <input type="radio"/> No response<br><small>           (\$({self_abt_last} = 'pills_abortion') or<br/>           (\$({self_abt_last} = 'pills_fever') or<br/>           (\$({self_abt_last} = ...         </small><br><input type="radio"/> Government hospital<br><input type="radio"/> Government health center<br><input type="radio"/> Family planning clinic<br><input type="radio"/> Mobile clinic (public)<br><input type="radio"/> Other public<br><input type="radio"/> Private hospital / clinic<br><input type="radio"/> Pharmacy<br><input type="radio"/> Private doctor<br><input type="radio"/> Mobile clinic (private)<br><input type="radio"/> Health agent<br><input type="radio"/> Other private<br><input type="radio"/> Store<br><input type="radio"/> Religious organizations<br><input type="radio"/> Community event<br><input type="radio"/> Friend / parent<br><input type="radio"/> Community health agent<br><input type="radio"/> Street vendor<br><input type="radio"/> Other<br><input type="radio"/> Do not know<br><input type="radio"/> No response |
| 731a. Did you have any issues and go to a health facility for treatment in the process of removing the pregnancy?<br><i>If the respondent already reported she went to a health facility in the process of removing the pregnancy, we are interested in whether she went back to a health facility on a separate occasion to treat complications that she may have experienced.</i> | <small>(\$({self_abt_yn} = 'yes')</small><br><input type="radio"/> Yes<br><input type="radio"/> No<br><input type="radio"/> Do not know<br><input type="radio"/> No response                                                                                                                                                                                                                                                                                                                                                                                                                                                                                                                                                                                                                                                                                                                                                                                                                                                                                                         |
| 732a. Did you tell any of the following people about this experience?<br><i>Read the answer choices aloud. Select all that apply.</i>                                                                                                                                                                                                                                               | <small>(\$({self_abt_yn} = 'yes')</small><br><input type="checkbox"/> Husband/male partner<br><input type="checkbox"/> Sister<br><input type="checkbox"/> Brother<br><input type="checkbox"/> Mother<br><input type="checkbox"/> Father<br><input type="checkbox"/> Other relative<br><input type="checkbox"/> Friend 1: \${friend1_name}<br><input type="checkbox"/> Friend 2: \${friend2_name}<br><input type="checkbox"/> Other friend<br><input type="checkbox"/> Other person<br><input type="checkbox"/> No one<br><input type="checkbox"/> Do not know<br><input type="checkbox"/> No response<br><small>           (\${friend1_name} != " and \${friend1_name} !=<br/>           '-99' and filter_list = 'friend1') or<br/>           (\${friend2_name} != " and \${friend2_name} !=<br/>           '-99' and filter_list = 'friend2') or (filter_list =<br/>           'always')         </small>                                                                                                                                                                           |
| 722b. Besides this event, have you ever done something to regulate your period when you were worried you were pregnant?<br><i>Probe to confirm whether the period regulation was successful. If not, select 'no.'</i>                                                                                                                                                               | <small>\$(self_abt_yn} = 'yes'</small><br><input type="radio"/> Yes<br><input type="radio"/> No<br><input type="radio"/> No response                                                                                                                                                                                                                                                                                                                                                                                                                                                                                                                                                                                                                                                                                                                                                                                                                                                                                                                                                 |
| 722b. Have you ever done something to regulate your period when you were worried you were pregnant?<br><i>Probe to confirm whether the period regulation was successful. If not, select 'no.'</i>                                                                                                                                                                                   | <small>\$(self_abt_yn} != 'yes'</small><br><input type="radio"/> Yes<br><input type="radio"/> No<br><input type="radio"/> No response                                                                                                                                                                                                                                                                                                                                                                                                                                                                                                                                                                                                                                                                                                                                                                                                                                                                                                                                                |
| 723b. In what year did this last happen?<br><i>If indicates happened more than once, specify most recent time.<br/>           Enter 2020 for 'Do not know' or 'No response'.</i>                                                                                                                                                                                                    | <small>(\$({self_reg_yn} = 'yes')</small><br>Year: _____                                                                                                                                                                                                                                                                                                                                                                                                                                                                                                                                                                                                                                                                                                                                                                                                                                                                                                                                                                                                                             |
| 724b. Did you do more than one thing to try to regulate your                                                                                                                                                                                                                                                                                                                        | <small>           ((\${self_reg_year} &gt; \${self_abt_year}) or<br/>           (\${self_abt_year} = "")) and ((\$({self_reg_yn} =         </small>                                                                                                                                                                                                                                                                                                                                                                                                                                                                                                                                                                                                                                                                                                                                                                                                                                                                                                                                  |

|                                           |                                                                                                                                                                                                                                                                                                                                                                                                                                                                                                                                                                                                                                                                                                                                                                                                                                                                 |
|-------------------------------------------|-----------------------------------------------------------------------------------------------------------------------------------------------------------------------------------------------------------------------------------------------------------------------------------------------------------------------------------------------------------------------------------------------------------------------------------------------------------------------------------------------------------------------------------------------------------------------------------------------------------------------------------------------------------------------------------------------------------------------------------------------------------------------------------------------------------------------------------------------------------------|
| period?                                   | <div>'yes'))</div> <div> <input type="radio"/> Yes <input type="radio"/> No <input type="radio"/> No response </div>                                                                                                                                                                                                                                                                                                                                                                                                                                                                                                                                                                                                                                                                                                                                            |
| 725b. What did you first do?              | <div>(({\$self_reg_year} &gt; {\$self_abt_year}) or<br/>({\$self_abt_year} = "")) and<br/>({\$self_reg_mult_yn} = 'ye ...</div> <div> <input type="radio"/> Surgical procedure (curettage, MVA, etc.) <input type="radio"/> Pills called mifepristone or misoprostol (Cytotec) <input type="radio"/> Medicines you take when you have a fever like antibiotics or anti-malarial medicine (Palujecte, Novaquine, Cyphaquine) <input type="radio"/> Other pills <input type="radio"/> Traditional methods that are not inserted into the vagina (herbs, potions, concoctions) <input type="radio"/> Ingested industrial products (bleach, Coke-Nescafé mix, etc.) <input type="radio"/> Insert materials into the vagina (stem, herb ball, kanigban, etc.) <input type="radio"/> Other <input type="radio"/> Do not know <input type="radio"/> No response </div> |
| 725b. What did you do?                    | <div>(({\$self_reg_year} &gt; {\$self_abt_year}) or<br/>({\$self_abt_year} = "")) and<br/>({\$self_reg_mult_yn} = 'no ...</div> <div> <input type="radio"/> Surgical procedure (curettage, MVA, etc.) <input type="radio"/> Pills called mifepristone or misoprostol (Cytotec) <input type="radio"/> Medicines you take when you have a fever like antibiotics or anti-malarial medicine (Palujecte, Novaquine, Cyphaquine) <input type="radio"/> Other pills <input type="radio"/> Traditional methods that are not inserted into the vagina (herbs, potions, concoctions) <input type="radio"/> Ingested industrial products (bleach, Coke-Nescafé mix, etc.) <input type="radio"/> Insert materials into the vagina (stem, herb ball, kanigban, etc.) <input type="radio"/> Other <input type="radio"/> Do not know <input type="radio"/> No response </div> |
| 726b. Where did you go for the procedure? | <div>(({\$self_reg_year} &gt; {\$self_abt_year}) or<br/>({\$self_abt_year} = "")) and (({\$self_reg_first} = 'surg ...</div> <div> <input type="radio"/> Government hospital <input type="radio"/> Government health center <input type="radio"/> Family planning clinic <input type="radio"/> Mobile clinic (public) <input type="radio"/> Other public <input type="radio"/> Private hospital / clinic <input type="radio"/> Pharmacy <input type="radio"/> Private doctor <input type="radio"/> Mobile clinic (private) <input type="radio"/> Health agent <input type="radio"/> Other private </div>                                                                                                                                                                                                                                                        |

|                                                                                     |                                                                                                                                                                                                                                                                                                                                                                                                                                                                                                                                                                                                                                                                                                                                                                                                                                                                                                                                                                                                                         |
|-------------------------------------------------------------------------------------|-------------------------------------------------------------------------------------------------------------------------------------------------------------------------------------------------------------------------------------------------------------------------------------------------------------------------------------------------------------------------------------------------------------------------------------------------------------------------------------------------------------------------------------------------------------------------------------------------------------------------------------------------------------------------------------------------------------------------------------------------------------------------------------------------------------------------------------------------------------------------------------------------------------------------------------------------------------------------------------------------------------------------|
|                                                                                     | <input type="radio"/> Store<br><input type="radio"/> Religious organizations<br><input type="radio"/> Community event<br><input type="radio"/> Friend / parent<br><input type="radio"/> Community health agent<br><input type="radio"/> Street vendor<br><input type="radio"/> Other<br><input type="radio"/> Do not know                                                                                                                                                                                                                                                                                                                                                                                                                                                                                                                                                                                                                                                                                               |
| 727b. Where did you get the medicines?                                              | <input type="radio"/> No response<br>(({\$self_reg_year} > {\$self_abt_year}) or<br>({\$self_abt_year} = "")) and (({\$self_reg_first} =<br>'pill ...<br><input type="radio"/> Government hospital<br><input type="radio"/> Government health center<br><input type="radio"/> Family planning clinic<br><input type="radio"/> Mobile clinic (public)<br><input type="radio"/> Other public<br><input type="radio"/> Private hospital / clinic<br><input type="radio"/> Pharmacy<br><input type="radio"/> Private doctor<br><input type="radio"/> Mobile clinic (private)<br><input type="radio"/> Health agent<br><input type="radio"/> Other private<br><input type="radio"/> Store<br><input type="radio"/> Religious organizations<br><input type="radio"/> Community event<br><input type="radio"/> Friend / parent<br><input type="radio"/> Community health agent<br><input type="radio"/> Street vendor<br><input type="radio"/> Other<br><input type="radio"/> Do not know<br><input type="radio"/> No response |
| 728b. What was the last thing you did that ultimately caused your period to return? | (({\$self_reg_year} > {\$self_abt_year}) or<br>({\$self_abt_year} = "")) and<br>(({\$self_reg_mult_yn} = 'ye ...<br><input type="radio"/> Surgical procedure (curettage, MVA, etc.)<br><input type="radio"/> Pills called mifepristone or misoprostol (Cytotec)<br><input type="radio"/> Medicines you take when you have a fever like antibiotics or anti-malarial medicine (Palujecte, Novaquine, Cyphaquine<br><input type="radio"/> Other pills<br><input type="radio"/> Traditional methods that are not inserted into the vagina (herbs, potions, concoctions)<br><input type="radio"/> Ingested industrial products (bleach, Coke-Nescafé mix, etc.)<br><input type="radio"/> Insert materials into the vagina (stem, herb ball, kanigban, etc.)<br><input type="radio"/> Other<br><input type="radio"/> Do not know<br><input type="radio"/> No response                                                                                                                                                        |
| 729b. Where did you go for the procedure?                                           | (({\$self_reg_year} > {\$self_abt_year}) or<br>({\$self_abt_year} = "")) and ({\$self_reg_last} =<br>'surger ...<br><input type="radio"/> Government hospital<br><input type="radio"/> Government health center<br><input type="radio"/> Family planning clinic<br><input type="radio"/> Mobile clinic (public)<br><input type="radio"/> Other public<br><input type="radio"/> Private hospital / clinic                                                                                                                                                                                                                                                                                                                                                                                                                                                                                                                                                                                                                |

|                                                                                                                                                                                                                                                                                                                                                                                    |                                                                                                                                                                                                                                                                                                                                                                                                                                                                                                                                                                                                                                                                                                                                                                                                                                                                                                                                                                                               |
|------------------------------------------------------------------------------------------------------------------------------------------------------------------------------------------------------------------------------------------------------------------------------------------------------------------------------------------------------------------------------------|-----------------------------------------------------------------------------------------------------------------------------------------------------------------------------------------------------------------------------------------------------------------------------------------------------------------------------------------------------------------------------------------------------------------------------------------------------------------------------------------------------------------------------------------------------------------------------------------------------------------------------------------------------------------------------------------------------------------------------------------------------------------------------------------------------------------------------------------------------------------------------------------------------------------------------------------------------------------------------------------------|
|                                                                                                                                                                                                                                                                                                                                                                                    | <input type="radio"/> Pharmacy<br><input type="radio"/> Private doctor<br><input type="radio"/> Mobile clinic (private)<br><input type="radio"/> Health agent<br><input type="radio"/> Other private<br><input type="radio"/> Store<br><input type="radio"/> Religious organizations<br><input type="radio"/> Community event<br><input type="radio"/> Friend / parent<br><input type="radio"/> Community health agent<br><input type="radio"/> Street vendor<br><input type="radio"/> Other<br><input type="radio"/> Do not know<br><input type="radio"/> No response                                                                                                                                                                                                                                                                                                                                                                                                                        |
| 730b. Where did you get the medicines?                                                                                                                                                                                                                                                                                                                                             | <p>(({\$self_reg_year} &gt; {\$self_abt_year}) or<br/> ({\$self_abt_year} = "")) and (({\$self_reg_last} =<br/> 'pills ...</p> <input type="radio"/> Government hospital<br><input type="radio"/> Government health center<br><input type="radio"/> Family planning clinic<br><input type="radio"/> Mobile clinic (public)<br><input type="radio"/> Other public<br><input type="radio"/> Private hospital / clinic<br><input type="radio"/> Pharmacy<br><input type="radio"/> Private doctor<br><input type="radio"/> Mobile clinic (private)<br><input type="radio"/> Health agent<br><input type="radio"/> Other private<br><input type="radio"/> Store<br><input type="radio"/> Religious organizations<br><input type="radio"/> Community event<br><input type="radio"/> Friend / parent<br><input type="radio"/> Community health agent<br><input type="radio"/> Street vendor<br><input type="radio"/> Other<br><input type="radio"/> Do not know<br><input type="radio"/> No response |
| 731b. Did you have any issues and go to a health facility for treatment in the process of regulating your period?<br><i>If the respondent already reported she went to a health facility in the process of regulating her period, we are interested in whether she went back to a health facility on a separate occasion to treat complications that she may have experienced.</i> | <p>(({\$self_reg_year} &gt; {\$self_abt_year}) or<br/> ({\$self_abt_year} = "")) and (({\$self_reg_yn} =<br/> 'yes'))</p> <input type="radio"/> Yes<br><input type="radio"/> No<br><input type="radio"/> Do not know<br><input type="radio"/> No response                                                                                                                                                                                                                                                                                                                                                                                                                                                                                                                                                                                                                                                                                                                                     |
| 732b. Did you tell any of the following people about this experience?<br><i>Read the answer choices aloud. Select all that apply.</i>                                                                                                                                                                                                                                              | <p>(({\$self_reg_year} &gt; {\$self_abt_year}) or<br/> ({\$self_abt_year} = "")) and (({\$self_reg_yn} =<br/> 'yes'))</p> <input type="checkbox"/> Husband/male partner<br><input type="checkbox"/> Sister<br><input type="checkbox"/> Brother<br><input type="checkbox"/> Mother<br><input type="checkbox"/> Father<br><input type="checkbox"/> Other relative<br><input type="checkbox"/> Friend 1: \${friend1_name}<br><input type="checkbox"/> Friend 2: \${friend2_name}<br><input type="checkbox"/> Other friend<br><input type="checkbox"/> Other person<br><input type="checkbox"/> No one<br><input type="checkbox"/> Do not know<br><input type="checkbox"/> No response<br><p>(\${friend1_name} != "" and \${friend1_name} !=<br/> '-99' and filter_list = 'friend1') or<br/> (\${friend2_name} != "" and \${friend2_name} !=<br/> '-99' and filter_list = 'friend2') or (filter_list =</p>                                                                                        |

|                                                                                                                                                                                                                                                                                                 |                                                                                                                                                                                                                                                                                                                                                                                                                                                                                                                                                                                                                                                                                                                                                                                                                                                                                                                                                                                                                                                                                                                                                                                                                                           |
|-------------------------------------------------------------------------------------------------------------------------------------------------------------------------------------------------------------------------------------------------------------------------------------------------|-------------------------------------------------------------------------------------------------------------------------------------------------------------------------------------------------------------------------------------------------------------------------------------------------------------------------------------------------------------------------------------------------------------------------------------------------------------------------------------------------------------------------------------------------------------------------------------------------------------------------------------------------------------------------------------------------------------------------------------------------------------------------------------------------------------------------------------------------------------------------------------------------------------------------------------------------------------------------------------------------------------------------------------------------------------------------------------------------------------------------------------------------------------------------------------------------------------------------------------------|
| <p>PNSME_701. What were the reasons that motivated you to remove the pregnancy for the last time ?</p>                                                                                                                                                                                          | <p style="text-align: right;">'always')<br/>({self_abt_yn} = 'yes')</p> <p><input type="checkbox"/> Husband's refusal (refusal to accept the child)</p> <p><input type="checkbox"/> No means (to take care of the child)</p> <p><input type="checkbox"/> Rape</p> <p><input type="checkbox"/> Incest</p> <p><input type="checkbox"/> Mother has health issues</p> <p><input type="checkbox"/> Possible health issues of the foetus</p> <p><input type="checkbox"/> Not ready to take responsibility</p> <p><input type="checkbox"/> Too immature or too young to have a child</p> <p><input type="checkbox"/> Wants to continue school</p> <p><input type="checkbox"/> Woman's parents want her to have an abortion</p> <p><input type="checkbox"/> Relationship issues or wants to avoid being a single mother.</p> <p><input type="checkbox"/> Has all the children she wanted</p> <p><input type="checkbox"/> Worried about how having a child might affect her life.</p> <p><input type="checkbox"/> Does not want others to know that she has had sexual intercourse or that she is pregnant</p> <p><input type="checkbox"/> Other</p> <p><input type="checkbox"/> None of the above</p> <p><input type="checkbox"/> No response</p> |
| <p>PNSME_702a. Besides this time, have you removed other pregnancies ?</p>                                                                                                                                                                                                                      | <p style="text-align: right;">({self_abt_yn} = 'yes')</p> <p><input type="radio"/> Yes</p> <p><input type="radio"/> No</p> <p><input type="radio"/> Do not know</p> <p><input type="radio"/> No response</p>                                                                                                                                                                                                                                                                                                                                                                                                                                                                                                                                                                                                                                                                                                                                                                                                                                                                                                                                                                                                                              |
| <p>PNSME_702b. How many times?<br/><i>Enter -88 for do not know, -99 for no response.</i></p>                                                                                                                                                                                                   | <p style="text-align: right;">\${abt_other_yn} = 'yes'</p> <p>-----</p>                                                                                                                                                                                                                                                                                                                                                                                                                                                                                                                                                                                                                                                                                                                                                                                                                                                                                                                                                                                                                                                                                                                                                                   |
| <p>PNSME_703. In what year did this happen for the first time ?<br/><i>Enter 2020 for no response</i></p>                                                                                                                                                                                       | <p style="text-align: right;">\${abt_other_yn} = 'yes'</p> <p>Year: -----</p>                                                                                                                                                                                                                                                                                                                                                                                                                                                                                                                                                                                                                                                                                                                                                                                                                                                                                                                                                                                                                                                                                                                                                             |
| <p>Now we want to ask you some general questions about removing a pregnancy. Please provide your responses in the form of: strongly agree, agree, neither agree nor disagree, disagree, strongly disagree.<br/><i>Check box to confirm scrolled to bottom.</i></p> <p>Press OK to continue.</p> | <p style="text-align: right;">\${consent_obtained}</p> <p><input type="radio"/> OK</p>                                                                                                                                                                                                                                                                                                                                                                                                                                                                                                                                                                                                                                                                                                                                                                                                                                                                                                                                                                                                                                                                                                                                                    |
| <p>733. It is okay for a woman to remove a pregnancy if continuing the pregnancy puts her health at risk.</p>                                                                                                                                                                                   | <p style="text-align: right;">\${consent_obtained}</p> <p><input type="radio"/> Strongly agree</p> <p><input type="radio"/> Agree</p> <p><input type="radio"/> Neither agree nor disagree</p> <p><input type="radio"/> Disagree</p> <p><input type="radio"/> Strongly disagree</p> <p><input type="radio"/> No response</p>                                                                                                                                                                                                                                                                                                                                                                                                                                                                                                                                                                                                                                                                                                                                                                                                                                                                                                               |
| <p>734. It is okay for a woman to remove a pregnancy if the pregnancy is a result of rape.</p>                                                                                                                                                                                                  | <p style="text-align: right;">\${consent_obtained}</p> <p><input type="radio"/> Strongly agree</p> <p><input type="radio"/> Agree</p> <p><input type="radio"/> Neither agree nor disagree</p> <p><input type="radio"/> Disagree</p> <p><input type="radio"/> Strongly disagree</p> <p><input type="radio"/> No response</p>                                                                                                                                                                                                                                                                                                                                                                                                                                                                                                                                                                                                                                                                                                                                                                                                                                                                                                               |
| <p>PNSME_734. It is acceptable for a woman to remove a pregnancy</p>                                                                                                                                                                                                                            | <p style="text-align: right;">\${consent_obtained}</p>                                                                                                                                                                                                                                                                                                                                                                                                                                                                                                                                                                                                                                                                                                                                                                                                                                                                                                                                                                                                                                                                                                                                                                                    |

|                                                                                                                                                                                                                                                                                                                                                                                             |                                                                                                                                                                                                                                                                                                                                                                                                                                                                                                                                                                                                                                                                                                                                                                                                    |
|---------------------------------------------------------------------------------------------------------------------------------------------------------------------------------------------------------------------------------------------------------------------------------------------------------------------------------------------------------------------------------------------|----------------------------------------------------------------------------------------------------------------------------------------------------------------------------------------------------------------------------------------------------------------------------------------------------------------------------------------------------------------------------------------------------------------------------------------------------------------------------------------------------------------------------------------------------------------------------------------------------------------------------------------------------------------------------------------------------------------------------------------------------------------------------------------------------|
| if this pregnancy was the result of incestuous sexual intercourse.                                                                                                                                                                                                                                                                                                                          | <input type="radio"/> Strongly agree<br><input type="radio"/> Agree<br><input type="radio"/> Neither agree nor disagree<br><input type="radio"/> Disagree<br><input type="radio"/> Strongly disagree<br><input type="radio"/> No response                                                                                                                                                                                                                                                                                                                                                                                                                                                                                                                                                          |
| 735. It is okay for a woman to remove a pregnancy if she cannot afford to raise another child.                                                                                                                                                                                                                                                                                              | <div> <input type="radio"/> Strongly agree<br/> <input type="radio"/> Agree<br/> <input type="radio"/> Neither agree nor disagree<br/> <input type="radio"/> Disagree<br/> <input type="radio"/> Strongly disagree<br/> <input type="radio"/> No response </div> <div> <input type="radio"/> Strongly agree<br/> <input type="radio"/> Agree<br/> <input type="radio"/> Neither agree nor disagree<br/> <input type="radio"/> Disagree<br/> <input type="radio"/> Strongly disagree<br/> <input type="radio"/> No response </div> <div> <input type="radio"/> Strongly agree<br/> <input type="radio"/> Agree<br/> <input type="radio"/> Neither agree nor disagree<br/> <input type="radio"/> Disagree<br/> <input type="radio"/> Strongly disagree<br/> <input type="radio"/> No response </div> |
| 736. It is okay for a woman to remove a pregnancy if she does not want to have a child.                                                                                                                                                                                                                                                                                                     | <div> <input type="radio"/> Strongly agree<br/> <input type="radio"/> Agree<br/> <input type="radio"/> Neither agree nor disagree<br/> <input type="radio"/> Disagree<br/> <input type="radio"/> Strongly disagree<br/> <input type="radio"/> No response </div> <div> <input type="radio"/> Strongly agree<br/> <input type="radio"/> Agree<br/> <input type="radio"/> Neither agree nor disagree<br/> <input type="radio"/> Disagree<br/> <input type="radio"/> Strongly disagree<br/> <input type="radio"/> No response </div> <div> <input type="radio"/> Strongly agree<br/> <input type="radio"/> Agree<br/> <input type="radio"/> Neither agree nor disagree<br/> <input type="radio"/> Disagree<br/> <input type="radio"/> Strongly disagree<br/> <input type="radio"/> No response </div> |
| 737. A woman who removes a pregnancy brings shame to her family.                                                                                                                                                                                                                                                                                                                            | <div> <input type="radio"/> Strongly agree<br/> <input type="radio"/> Agree<br/> <input type="radio"/> Neither agree nor disagree<br/> <input type="radio"/> Disagree<br/> <input type="radio"/> Strongly disagree<br/> <input type="radio"/> No response </div> <div> <input type="radio"/> Strongly agree<br/> <input type="radio"/> Agree<br/> <input type="radio"/> Neither agree nor disagree<br/> <input type="radio"/> Disagree<br/> <input type="radio"/> Strongly disagree<br/> <input type="radio"/> No response </div> <div> <input type="radio"/> Strongly agree<br/> <input type="radio"/> Agree<br/> <input type="radio"/> Neither agree nor disagree<br/> <input type="radio"/> Disagree<br/> <input type="radio"/> Strongly disagree<br/> <input type="radio"/> No response </div> |
| 738. A woman who removes a pregnancy should not tell anyone.                                                                                                                                                                                                                                                                                                                                | <div> <input type="radio"/> Strongly agree<br/> <input type="radio"/> Agree<br/> <input type="radio"/> Neither agree nor disagree<br/> <input type="radio"/> Disagree<br/> <input type="radio"/> Strongly disagree<br/> <input type="radio"/> No response </div> <div> <input type="radio"/> Strongly agree<br/> <input type="radio"/> Agree<br/> <input type="radio"/> Neither agree nor disagree<br/> <input type="radio"/> Disagree<br/> <input type="radio"/> Strongly disagree<br/> <input type="radio"/> No response </div> <div> <input type="radio"/> Strongly agree<br/> <input type="radio"/> Agree<br/> <input type="radio"/> Neither agree nor disagree<br/> <input type="radio"/> Disagree<br/> <input type="radio"/> Strongly disagree<br/> <input type="radio"/> No response </div> |
| PNSME_704a. Do you know if there is a law on abortion in Cote d'Ivoire ?                                                                                                                                                                                                                                                                                                                    | <div> <input type="radio"/> Yes<br/> <input type="radio"/> No<br/> <input type="radio"/> Do not know<br/> <input type="radio"/> No response </div> <div> <input type="radio"/> Yes<br/> <input type="radio"/> No<br/> <input type="radio"/> Do not know<br/> <input type="radio"/> No response </div> <div> <input type="radio"/> Yes<br/> <input type="radio"/> No<br/> <input type="radio"/> Do not know<br/> <input type="radio"/> No response </div>                                                                                                                                                                                                                                                                                                                                           |
| PNSME_704b. Are there instances when it is legal to have an abortion in Côte d'Ivoire ?                                                                                                                                                                                                                                                                                                     | <div> <input type="radio"/> Yes<br/> <input type="radio"/> No<br/> <input type="radio"/> Do not know<br/> <input type="radio"/> No response </div> <div> <input type="radio"/> Yes<br/> <input type="radio"/> No<br/> <input type="radio"/> Do not know<br/> <input type="radio"/> No response </div> <div> <input type="radio"/> Yes<br/> <input type="radio"/> No<br/> <input type="radio"/> Do not know<br/> <input type="radio"/> No response </div>                                                                                                                                                                                                                                                                                                                                           |
| FLW_801. Thank you for the time you have kindly granted us. We are very interested in hearing more about your pregnancy removal or period regulation experience, including your decision making around what method to use and where to go for services, among other things. Would you be willing to meet with another woman from the project at a later date to talk about this experience? | <div> <input type="radio"/> Yes<br/> <input type="radio"/> No<br/> <input type="radio"/> No response </div> <div> <input type="radio"/> Yes<br/> <input type="radio"/> No<br/> <input type="radio"/> No response </div> <div> <input type="radio"/> Yes<br/> <input type="radio"/> No<br/> <input type="radio"/> No response </div>                                                                                                                                                                                                                                                                                                                                                                                                                                                                |
| FLW_802. Do you own a phone?                                                                                                                                                                                                                                                                                                                                                                | <div> <input type="radio"/> Yes<br/> <input type="radio"/> No<br/> <input type="radio"/> No response </div> <div> <input type="radio"/> Yes<br/> <input type="radio"/> No<br/> <input type="radio"/> No response </div> <div> <input type="radio"/> Yes<br/> <input type="radio"/> No<br/> <input type="radio"/> No response </div>                                                                                                                                                                                                                                                                                                                                                                                                                                                                |
| FLW_803. Can I have your primary phone number in case we would like to follow up with you in the future?<br><i>Enter an 8-digit number without the country code. Do not include spaces or dashes. Enter 0 for no response.</i>                                                                                                                                                              | <div> <input type="radio"/> Yes<br/> <input type="radio"/> No<br/> <input type="radio"/> No response </div> <div> <input type="radio"/> Yes<br/> <input type="radio"/> No<br/> <input type="radio"/> No response </div> <div> <input type="radio"/> Yes<br/> <input type="radio"/> No<br/> <input type="radio"/> No response </div>                                                                                                                                                                                                                                                                                                                                                                                                                                                                |
| FLW_804. Can you repeat the number again?<br><i>Enter an 8-digit number without the country code. Do not include spaces</i>                                                                                                                                                                                                                                                                 | <div> <input type="radio"/> Yes<br/> <input type="radio"/> No<br/> <input type="radio"/> No response </div> <div> <input type="radio"/> Yes<br/> <input type="radio"/> No<br/> <input type="radio"/> No response </div> <div> <input type="radio"/> Yes<br/> <input type="radio"/> No<br/> <input type="radio"/> No response </div>                                                                                                                                                                                                                                                                                                                                                                                                                                                                |



or dashes. Enter 0 for no response.

Thank the respondent for her time.

The respondent is finished, but there are still more questions for you to complete outside the home.

### Location and Questionnaire result

095. Location

Take a GPS point near the entrance to the household. Record location when the accuracy is smaller than 6 m.

Always

096. How many times have you visited this household to interview this female respondent?

Always

- ☐ 1st time
- ☐ 2nd time
- ☐ 3rd time

097. In what language was this interview conducted?

009a = 1

- ☐ English
- ☐ French
- ☐ Arabic
- ☐ Baoule
- ☐ Senoufo
- ☐ Yacouba
- ☐ Agni
- ☐ Attie
- ☐ Guere
- ☐ Bete
- ☐ Dioula
- ☐ Abbey
- ☐ Mahou
- ☐ Wobe
- ☐ Lobi
- ☐ Other

099. Questionnaire Result

Record the result of the questionnaire.

Always

- ☐ Completed
- ☐ Not at home
- ☐ Postponed
- ☐ Refused
- ☐ Partly completed
- ☐ Incapacitated
